# Supplementary material for: Interface-driven spin filtering and diode effects in van der Waals junctions based on magnetic metal–organic frameworks
Source: Royal Society of Chemistry journal article supplement (doi:10.1039/d5cp00102a), 2025-01-01
Supplement: d5cp00102a1.pdf [file d5cp00102a1.pdf]

## Electronic supplementary information

# Interface-driven spin filtering and diode effects in van der Waals junctions based on magnetic metal-organic frameworks

Mingqiang Ge, Ziqiang Liu, Tong Chen, Liang Xu, Lin Huang\*

<sup>1</sup> School of Energy and Mechanical Engineering, Energy materials computing center, Jiangxi University of Science and Technology, Nanchang 330013, China

\*Corresponding author. E-mail address: lin\_huang@hnu.edu.cn (Lin Huang)

### 1. Total energy as a function of layer distance

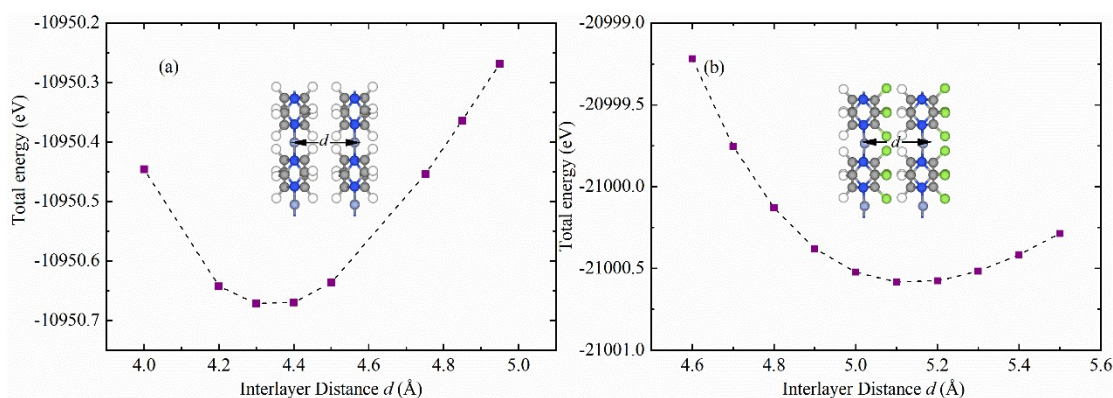

Fig. S1 Total energy as a function of layer distance for (a)  $\text{Cr}(\text{pyz})_2$  and (b)  $\text{Cr}(\text{h-fpyz})_2$ .

### 2. Bias dependent transmission spectrum for $\text{Cr}(\text{pyz})_2$ -based junctions

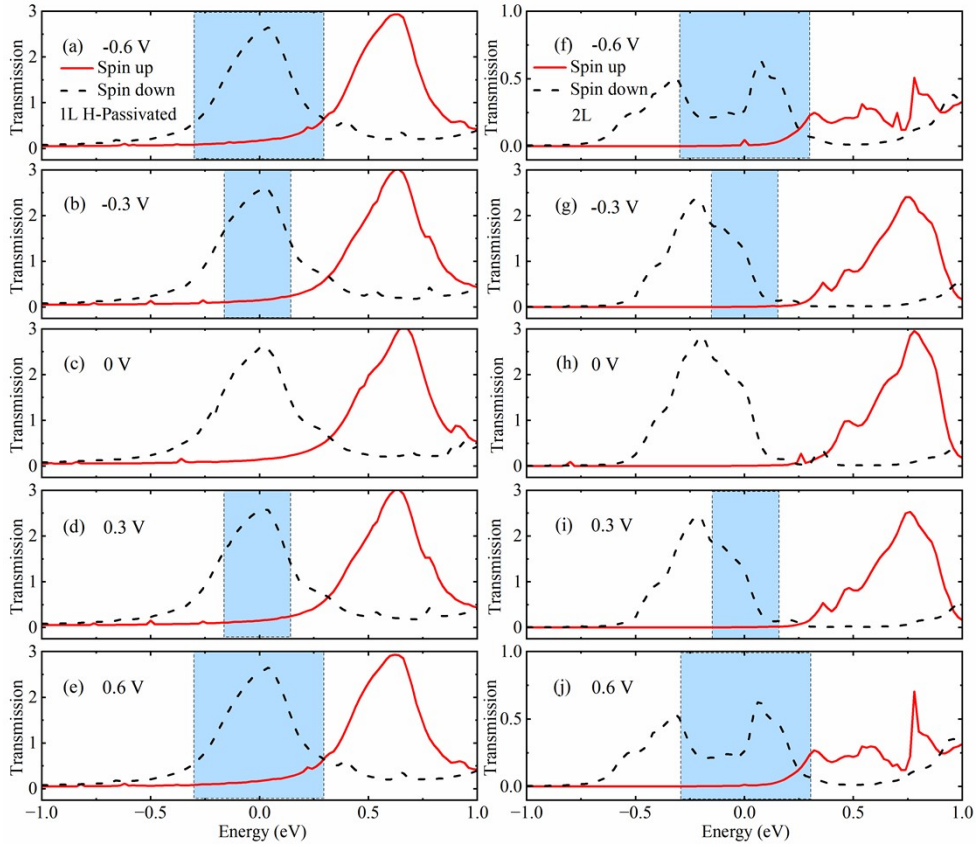

Fig. S2 Bias-dependent transmission spectrum for (a)-(e) monolayer and (f)-(j) bilayer  $\text{Cr}(\text{pyz})_2$

### 3. Bias dependent transmission spectrum for $\text{Cr}(\text{h-fpyz})_2$ -based junctions

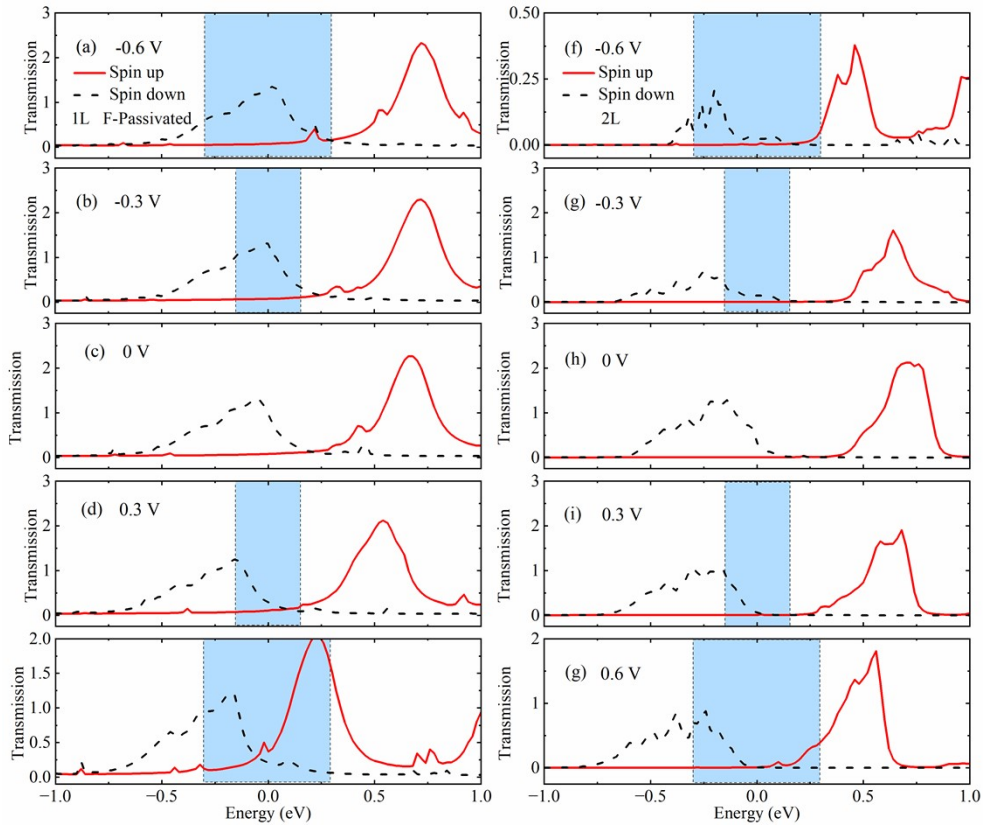

Fig. S3 Bias-dependent transmission spectrum for (a)-(e) monolayer and (f)-(j) bilayer  $\text{Cr}(\text{h-fpyz})_2$

**4. Spin-resolved transmission spectrum for junctions based on 1L/2L two sides dual-side fluorinated**

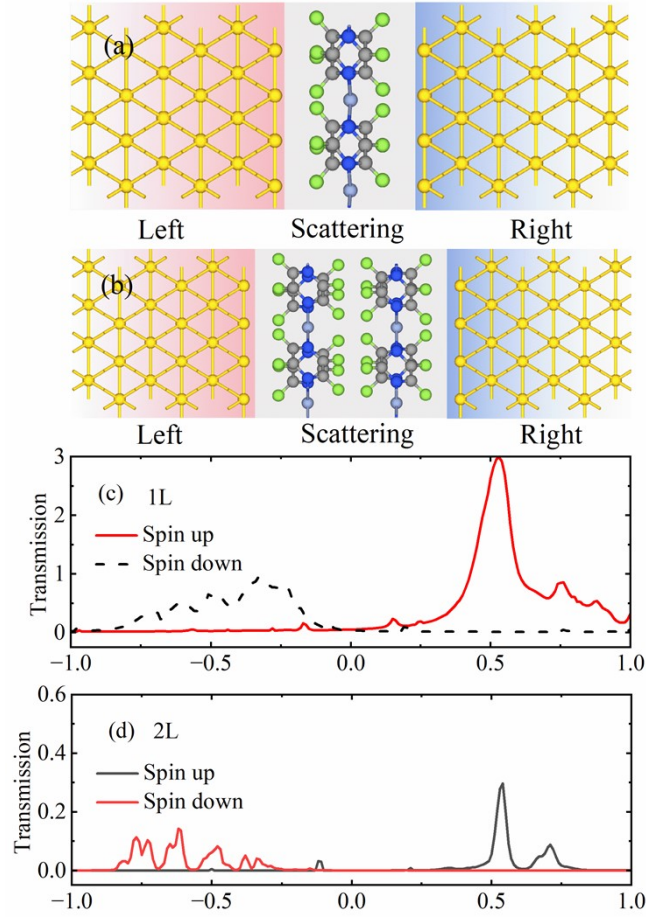

Fig. S4. Spin-resolved transmission spectrum for (a)-(e) monolayer and (f)-(j) bilayer  $\text{Cr}(\text{h-fpyz})_2$  under zero bias.

**5. Bias dependent PLDOS for  $\text{Cr}(\text{pyz})_2$  and  $\text{Cr}(\text{h-fpyz})_2$ -based junctions**

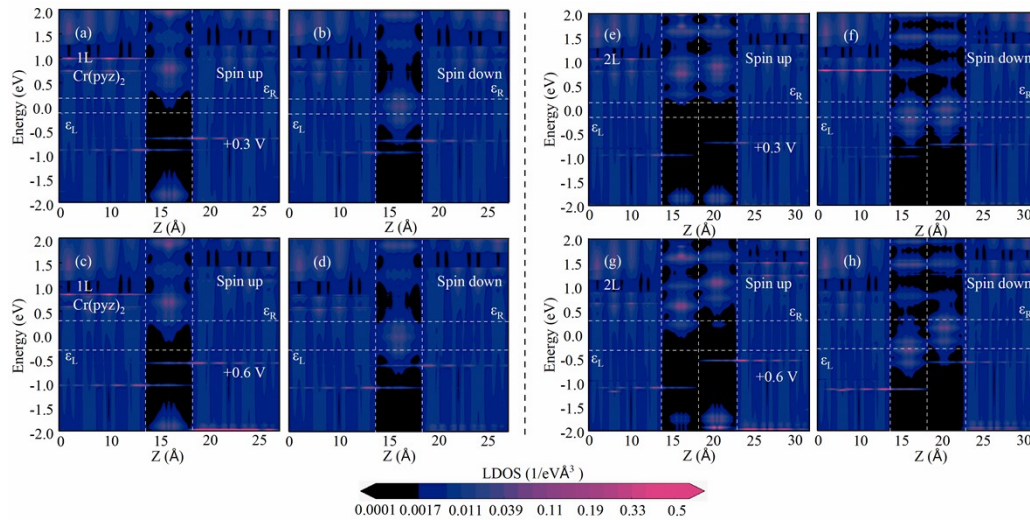

Fig. S5. Spin-resolved projected local density of states (PLDOS) for the junctions based on monolayer (1L) (a)-(d) and bilayer (2L) (e)-(f)  $\text{Cr}(\text{pyz})_2$  under biases of 0.3 V and 0.6 V.

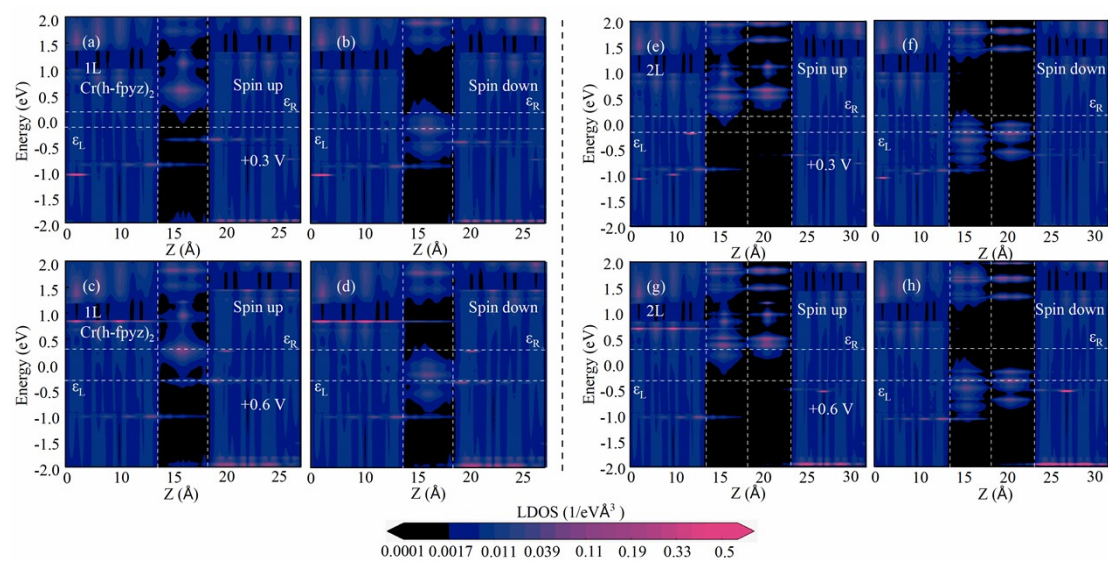

Fig. S6. Spin-resolved projected local density of states (PLDOS) for the junctions based on monolayer (1L) (a)-(d) and bilayer (2L) (e)-(f)  $\text{Cr}(\text{h-fpyz})_2$  under biases of 0.3 V and 0.6 V.

## 6. The coordinates of the isolated molecule and junctions

Isolated 1L- $\text{Cr}(\text{pyz})_2$  molecule

42

Bulk

|    |               |              |              |
|----|---------------|--------------|--------------|
| C  | 8.414293e+00  | 2.545384e+00 | 6.520332e+00 |
| C  | 1.384698e+00  | 7.243031e+00 | 6.519644e+00 |
| C  | 3.518044e+00  | 2.347153e+00 | 6.523080e+00 |
| C  | 6.280897e+00  | 7.441951e+00 | 6.521922e+00 |
| C  | 2.549050e+00  | 1.380841e+00 | 6.518800e+00 |
| C  | 7.249998e+00  | 8.408133e+00 | 6.517361e+00 |
| C  | 7.446545e+00  | 3.512744e+00 | 6.521759e+00 |
| C  | 2.352312e+00  | 6.275652e+00 | 6.521295e+00 |
| C  | 7.255115e+00  | 1.382927e+00 | 8.143506e+00 |
| C  | 2.543487e+00  | 8.405471e+00 | 8.143129e+00 |
| C  | 2.354296e+00  | 3.507384e+00 | 8.144543e+00 |
| C  | 7.444683e+00  | 6.281999e+00 | 8.143539e+00 |
| C  | 1.385448e+00  | 2.541275e+00 | 8.140284e+00 |
| C  | 8.413608e+00  | 7.248020e+00 | 8.138990e+00 |
| C  | 6.287310e+00  | 2.350079e+00 | 8.144869e+00 |
| C  | 3.511168e+00  | 7.438195e+00 | 8.144820e+00 |
| Cr | -8.028851e-05 | 9.790695e+00 | 7.325646e+00 |
| Cr | 4.899533e+00  | 4.894396e+00 | 7.335695e+00 |

|   |              |              |              |
|---|--------------|--------------|--------------|
| H | 9.276413e+00 | 2.640907e+00 | 5.861100e+00 |
| H | 5.225958e-01 | 7.147506e+00 | 5.860491e+00 |
| H | 4.382581e+00 | 2.252098e+00 | 5.866734e+00 |
| H | 5.416149e+00 | 7.537128e+00 | 5.865985e+00 |
| H | 2.644563e+00 | 5.192530e-01 | 5.858619e+00 |
| H | 7.154486e+00 | 9.269659e+00 | 5.857174e+00 |
| H | 7.540313e+00 | 4.375495e+00 | 5.863075e+00 |
| H | 2.258451e+00 | 5.412729e+00 | 5.862941e+00 |
| H | 7.161245e+00 | 5.201577e-01 | 8.802159e+00 |
| H | 2.637039e+00 | 9.268016e+00 | 8.802179e+00 |
| H | 2.259517e+00 | 4.368427e+00 | 8.805324e+00 |
| H | 7.539412e+00 | 5.421168e+00 | 8.804619e+00 |
| H | 5.211980e-01 | 2.636084e+00 | 8.796629e+00 |
| H | 9.277787e+00 | 7.153433e+00 | 8.795474e+00 |
| H | 5.425009e+00 | 2.254351e+00 | 8.803744e+00 |
| H | 4.373049e+00 | 7.533445e+00 | 8.804262e+00 |
| N | 8.376987e+00 | 1.421851e+00 | 7.330849e+00 |
| N | 1.422121e+00 | 8.366756e+00 | 7.329852e+00 |
| N | 6.320073e+00 | 6.319931e+00 | 7.334578e+00 |
| N | 3.478864e+00 | 3.469289e+00 | 7.335558e+00 |
| N | 8.375345e+00 | 8.369219e+00 | 7.325443e+00 |
| N | 1.423825e+00 | 1.419729e+00 | 7.327167e+00 |
| N | 6.324414e+00 | 3.473387e+00 | 7.334055e+00 |
| N | 3.474291e+00 | 6.315128e+00 | 7.333659e+00 |

Isolated 2L-Cr(py<sub>2</sub>)<sub>2</sub> molecule

84

Bulk

|   |              |              |              |
|---|--------------|--------------|--------------|
| H | 7.729165e+00 | 4.728285e+00 | 9.693828e+00 |
| H | 2.237752e+00 | 5.713791e+00 | 9.696146e+00 |
| H | 9.487451e+00 | 2.988647e+00 | 9.700406e+00 |
| H | 4.820574e-01 | 7.455811e+00 | 9.701261e+00 |
| H | 5.475042e+00 | 7.983428e+00 | 9.719731e+00 |
| H | 2.737834e+00 | 7.184759e-01 | 9.716365e+00 |
| H | 7.229421e+00 | 9.726218e+00 | 9.717650e+00 |
| H | 4.494138e+00 | 2.459150e+00 | 9.719982e+00 |
| C | 7.606156e+00 | 3.832761e+00 | 1.032510e+01 |
| C | 2.363610e+00 | 6.610198e+00 | 1.032518e+01 |
| C | 8.591396e+00 | 2.858294e+00 | 1.032895e+01 |
| C | 1.379293e+00 | 7.585531e+00 | 1.032872e+01 |
| C | 6.378860e+00 | 7.845845e+00 | 1.033543e+01 |
| C | 7.362367e+00 | 8.822247e+00 | 1.033395e+01 |
| C | 2.606761e+00 | 1.621189e+00 | 1.033490e+01 |
| C | 3.591646e+00 | 2.596182e+00 | 1.033752e+01 |
| N | 6.461245e+00 | 6.704003e+00 | 1.110012e+01 |

|    |              |              |              |
|----|--------------|--------------|--------------|
| N  | 1.464029e+00 | 1.711817e+00 | 1.109748e+01 |
| N  | 3.499508e+00 | 6.692836e+00 | 1.109921e+01 |
| N  | 6.471330e+00 | 3.749724e+00 | 1.109989e+01 |
| N  | 8.505008e+00 | 8.732028e+00 | 1.109748e+01 |
| Cr | 4.985065e+00 | 5.219338e+00 | 1.099706e+01 |
| N  | 3.510238e+00 | 3.737352e+00 | 1.110320e+01 |
| Cr | 9.991921e+00 | 2.399593e-01 | 1.099979e+01 |
| N  | 1.453900e+00 | 8.718303e+00 | 1.110697e+01 |
| N  | 8.517834e+00 | 1.725500e+00 | 1.110783e+01 |
| C  | 7.606909e+00 | 6.613741e+00 | 1.186781e+01 |
| C  | 1.381806e+00 | 2.856610e+00 | 1.186681e+01 |
| C  | 8.587663e+00 | 7.587508e+00 | 1.186681e+01 |
| C  | 2.363901e+00 | 3.828996e+00 | 1.186956e+01 |
| C  | 3.574639e+00 | 7.828910e+00 | 1.188205e+01 |
| C  | 6.398231e+00 | 2.615493e+00 | 1.188541e+01 |
| C  | 2.592414e+00 | 8.801416e+00 | 1.188610e+01 |
| C  | 7.380828e+00 | 1.643451e+00 | 1.188902e+01 |
| H  | 7.725260e+00 | 5.704318e+00 | 1.247531e+01 |
| H  | 4.723322e-01 | 2.980396e+00 | 1.247340e+01 |
| H  | 9.496287e+00 | 7.465126e+00 | 1.247511e+01 |
| H  | 2.246112e+00 | 4.738502e+00 | 1.247710e+01 |
| H  | 4.477485e+00 | 7.944883e+00 | 1.250027e+01 |
| H  | 5.496869e+00 | 2.501220e+00 | 1.250602e+01 |
| H  | 2.702514e+00 | 9.703108e+00 | 1.250676e+01 |
| H  | 7.272130e+00 | 7.427400e-01 | 1.251127e+01 |
| H  | 7.705183e+00 | 4.718339e+00 | 1.446365e+01 |
| H  | 2.266882e+00 | 5.723771e+00 | 1.446547e+01 |
| H  | 9.479172e+00 | 2.958751e+00 | 1.446934e+01 |
| H  | 4.907061e-01 | 7.481189e+00 | 1.447167e+01 |
| H  | 5.485556e+00 | 7.957684e+00 | 1.449458e+01 |
| H  | 2.715745e+00 | 7.269883e-01 | 1.449544e+01 |
| H  | 7.257758e+00 | 9.717381e+00 | 1.449565e+01 |
| H  | 4.488136e+00 | 2.486129e+00 | 1.450041e+01 |
| C  | 7.596121e+00 | 3.817881e+00 | 1.508630e+01 |
| C  | 2.375869e+00 | 6.624997e+00 | 1.508691e+01 |
| C  | 8.577736e+00 | 2.844808e+00 | 1.509000e+01 |
| C  | 1.392768e+00 | 7.596496e+00 | 1.509105e+01 |
| C  | 6.393703e+00 | 7.834494e+00 | 1.510328e+01 |
| C  | 7.375060e+00 | 8.807622e+00 | 1.510287e+01 |
| C  | 2.596996e+00 | 1.635874e+00 | 1.510366e+01 |
| C  | 3.578474e+00 | 2.608925e+00 | 1.510702e+01 |
| N  | 6.475107e+00 | 6.689824e+00 | 1.587288e+01 |
| N  | 1.450472e+00 | 1.726073e+00 | 1.587012e+01 |
| N  | 3.513732e+00 | 6.708030e+00 | 1.586666e+01 |

|    |              |              |              |
|----|--------------|--------------|--------------|
| N  | 6.459236e+00 | 3.736674e+00 | 1.586792e+01 |
| N  | 8.519962e+00 | 8.716554e+00 | 1.587142e+01 |
| Cr | 4.985370e+00 | 5.220103e+00 | 1.597456e+01 |
| N  | 3.495661e+00 | 3.752938e+00 | 1.587715e+01 |
| Cr | 9.991991e+00 | 2.392872e-01 | 1.597754e+01 |
| N  | 1.466143e+00 | 8.731322e+00 | 1.587567e+01 |
| N  | 8.503700e+00 | 1.710274e+00 | 1.587507e+01 |
| C  | 7.616766e+00 | 6.599461e+00 | 1.663713e+01 |
| C  | 1.367608e+00 | 2.867766e+00 | 1.663509e+01 |
| C  | 8.601046e+00 | 7.575032e+00 | 1.663656e+01 |
| C  | 2.351734e+00 | 3.843489e+00 | 1.663879e+01 |
| C  | 3.588343e+00 | 7.842118e+00 | 1.664366e+01 |
| C  | 6.384772e+00 | 2.604586e+00 | 1.664712e+01 |
| C  | 2.602471e+00 | 8.816039e+00 | 1.664814e+01 |
| C  | 7.368571e+00 | 1.628662e+00 | 1.665041e+01 |
| H  | 7.747157e+00 | 5.696435e+00 | 1.725532e+01 |
| H  | 4.627945e-01 | 3.005509e+00 | 1.724915e+01 |
| H  | 9.502655e+00 | 7.438293e+00 | 1.725548e+01 |
| H  | 2.218271e+00 | 4.747152e+00 | 1.725539e+01 |
| H  | 4.485697e+00 | 7.974148e+00 | 1.726998e+01 |
| H  | 5.488276e+00 | 2.476178e+00 | 1.727605e+01 |
| H  | 2.726266e+00 | 9.712551e+00 | 1.727785e+01 |
| H  | 7.242927e+00 | 7.329009e-01 | 1.728056e+01 |

Isolated 1L-Cr(f-hpyz)<sub>2</sub> molecule

42

Bulk

|    |              |              |              |
|----|--------------|--------------|--------------|
| C  | 2.533435e+00 | 1.499003e+00 | 6.553500e+00 |
| C  | 3.494070e+00 | 2.480701e+00 | 6.552623e+00 |
| C  | 2.477449e+00 | 3.480901e+00 | 8.360801e+00 |
| C  | 1.513881e+00 | 2.498005e+00 | 8.360499e+00 |
| C  | 7.457307e+00 | 6.560264e+00 | 8.360715e+00 |
| C  | 8.421002e+00 | 7.543128e+00 | 8.360371e+00 |
| C  | 7.401416e+00 | 8.542209e+00 | 6.553420e+00 |
| C  | 6.440746e+00 | 7.560629e+00 | 6.552600e+00 |
| C  | 1.476357e+00 | 7.501219e+00 | 6.548994e+00 |
| C  | 2.432283e+00 | 6.515165e+00 | 6.557240e+00 |
| C  | 3.445994e+00 | 7.512268e+00 | 8.368440e+00 |
| C  | 2.488018e+00 | 8.500915e+00 | 8.360370e+00 |
| C  | 6.488742e+00 | 2.528599e+00 | 8.368278e+00 |
| C  | 7.446506e+00 | 1.539919e+00 | 8.359983e+00 |
| C  | 8.458725e+00 | 2.540113e+00 | 6.549331e+00 |
| C  | 7.502701e+00 | 3.526183e+00 | 6.557609e+00 |
| Cr | 4.967439e+00 | 5.020568e+00 | 7.546794e+00 |

|    |              |              |              |
|----|--------------|--------------|--------------|
| Cr | 0.000000e+00 | 0.000000e+00 | 7.536320e+00 |
| F  | 5.542358e+00 | 2.562280e+00 | 9.319024e+00 |
| F  | 5.591978e-01 | 2.472035e+00 | 9.303123e+00 |
| F  | 9.375663e+00 | 7.569025e+00 | 9.302958e+00 |
| F  | 4.392111e+00 | 7.478159e+00 | 9.319366e+00 |
| F  | 2.484631e+00 | 4.434853e+00 | 9.304191e+00 |
| F  | 2.477982e+00 | 9.456550e+00 | 9.302053e+00 |
| F  | 7.456095e+00 | 5.838982e-01 | 9.301369e+00 |
| F  | 7.450044e+00 | 5.606358e+00 | 9.304085e+00 |
| H  | 2.589348e+00 | 6.628363e-01 | 5.842437e+00 |
| H  | 2.374647e+00 | 5.675708e+00 | 5.850233e+00 |
| H  | 7.560487e+00 | 4.365780e+00 | 5.850865e+00 |
| H  | 7.345530e+00 | 9.378514e+00 | 5.842452e+00 |
| H  | 6.433249e-01 | 7.463881e+00 | 5.833189e+00 |
| H  | 5.604919e+00 | 7.599263e+00 | 5.840292e+00 |
| H  | 4.329862e+00 | 2.442130e+00 | 5.840302e+00 |
| H  | 9.291864e+00 | 2.577725e+00 | 5.833722e+00 |
| N  | 3.489655e+00 | 3.547517e+00 | 7.441155e+00 |
| N  | 1.467143e+00 | 1.483672e+00 | 7.442120e+00 |
| N  | 8.467810e+00 | 8.557411e+00 | 7.441958e+00 |
| N  | 6.445112e+00 | 6.493739e+00 | 7.441063e+00 |
| N  | 3.495404e+00 | 6.498770e+00 | 7.449434e+00 |
| N  | 1.482680e+00 | 8.571425e+00 | 7.433435e+00 |
| N  | 8.452448e+00 | 1.469878e+00 | 7.433724e+00 |
| N  | 6.439642e+00 | 3.542565e+00 | 7.449835e+00 |

Isolated 2L-Cr(f-hpyz)<sub>2</sub> molecule

84

Bulk

|   |              |              |              |
|---|--------------|--------------|--------------|
| H | 7.153660e+00 | 9.238161e-01 | 9.423095e+00 |
| H | 2.279939e+00 | 9.596230e+00 | 9.423628e+00 |
| H | 7.288680e+00 | 5.898519e+00 | 9.430198e+00 |
| H | 2.144705e+00 | 4.621119e+00 | 9.430208e+00 |
| H | 3.699554e-01 | 2.876354e+00 | 9.432343e+00 |
| H | 9.063388e+00 | 7.643381e+00 | 9.432358e+00 |
| H | 5.370042e+00 | 2.660080e+00 | 9.440139e+00 |
| H | 4.063439e+00 | 7.859911e+00 | 9.440771e+00 |
| C | 7.190900e+00 | 1.759047e+00 | 1.013890e+01 |
| C | 2.242425e+00 | 8.760894e+00 | 1.013924e+01 |
| C | 7.250143e+00 | 6.736566e+00 | 1.014251e+01 |
| C | 2.183180e+00 | 3.783107e+00 | 1.014253e+01 |
| C | 8.229216e+00 | 7.699582e+00 | 1.014333e+01 |
| C | 1.203989e+00 | 2.820125e+00 | 1.014341e+01 |
| C | 6.207358e+00 | 2.717701e+00 | 1.014715e+01 |
| C | 3.225983e+00 | 7.802141e+00 | 1.014751e+01 |



|    |              |              |              |
|----|--------------|--------------|--------------|
| N  | 8.258376e+00 | 1.765171e+00 | 1.102334e+01 |
| N  | 1.174920e+00 | 8.754814e+00 | 1.102363e+01 |
| N  | 6.185973e+00 | 6.741158e+00 | 1.103097e+01 |
| N  | 3.247276e+00 | 3.778466e+00 | 1.103106e+01 |
| N  | 8.244375e+00 | 8.768797e+00 | 1.103186e+01 |
| N  | 1.188701e+00 | 1.751013e+00 | 1.103203e+01 |
| N  | 6.191002e+00 | 3.783639e+00 | 1.103934e+01 |
| N  | 3.242326e+00 | 6.736264e+00 | 1.103974e+01 |
| Cr | 9.724297e+00 | 2.788880e-01 | 1.112622e+01 |
| Cr | 4.716565e+00 | 5.259868e+00 | 1.113670e+01 |
| C  | 1.244786e+00 | 7.746195e+00 | 1.194989e+01 |
| C  | 8.188043e+00 | 2.773185e+00 | 1.195028e+01 |
| C  | 7.232680e+00 | 8.722068e+00 | 1.195028e+01 |
| C  | 2.200446e+00 | 1.797672e+00 | 1.195041e+01 |
| C  | 6.252326e+00 | 7.756019e+00 | 1.195062e+01 |
| C  | 3.180833e+00 | 2.763594e+00 | 1.195071e+01 |
| C  | 2.230947e+00 | 6.785697e+00 | 1.195818e+01 |
| C  | 7.201915e+00 | 3.733896e+00 | 1.195835e+01 |
| F  | 2.912030e-01 | 7.756001e+00 | 1.289128e+01 |
| F  | 9.141241e+00 | 2.762931e+00 | 1.289196e+01 |
| F  | 7.258507e+00 | 9.679251e+00 | 1.289286e+01 |
| F  | 2.174546e+00 | 8.404666e-01 | 1.289303e+01 |
| F  | 5.300852e+00 | 7.748928e+00 | 1.289399e+01 |
| F  | 4.132351e+00 | 2.770604e+00 | 1.289410e+01 |
| F  | 2.264545e+00 | 5.836802e+00 | 1.290893e+01 |
| F  | 7.167889e+00 | 4.682523e+00 | 1.290927e+01 |
| H  | 7.153660e+00 | 9.238161e-01 | 1.452310e+01 |
| H  | 2.279939e+00 | 9.596230e+00 | 1.452363e+01 |
| H  | 7.288680e+00 | 5.898519e+00 | 1.453020e+01 |
| H  | 2.144705e+00 | 4.621119e+00 | 1.453021e+01 |
| H  | 3.699554e-01 | 2.876354e+00 | 1.453234e+01 |
| H  | 9.063388e+00 | 7.643381e+00 | 1.453236e+01 |
| H  | 5.370042e+00 | 2.660080e+00 | 1.454014e+01 |
| H  | 4.063439e+00 | 7.859911e+00 | 1.454077e+01 |
| C  | 7.190900e+00 | 1.759047e+00 | 1.523890e+01 |
| C  | 2.242425e+00 | 8.760894e+00 | 1.523924e+01 |
| C  | 7.250143e+00 | 6.736566e+00 | 1.524251e+01 |
| C  | 2.183180e+00 | 3.783107e+00 | 1.524253e+01 |
| C  | 8.229216e+00 | 7.699582e+00 | 1.524333e+01 |
| C  | 1.203989e+00 | 2.820125e+00 | 1.524341e+01 |
| C  | 6.207358e+00 | 2.717701e+00 | 1.524715e+01 |
| C  | 3.225983e+00 | 7.802141e+00 | 1.524751e+01 |
| N  | 8.258376e+00 | 1.765171e+00 | 1.612334e+01 |
| N  | 1.174920e+00 | 8.754814e+00 | 1.612363e+01 |

|    |              |              |              |
|----|--------------|--------------|--------------|
| N  | 6.185973e+00 | 6.741158e+00 | 1.613097e+01 |
| N  | 3.247276e+00 | 3.778466e+00 | 1.613106e+01 |
| N  | 8.244375e+00 | 8.768797e+00 | 1.613186e+01 |
| N  | 1.188701e+00 | 1.751013e+00 | 1.613203e+01 |
| N  | 6.191002e+00 | 3.783639e+00 | 1.613934e+01 |
| N  | 3.242326e+00 | 6.736264e+00 | 1.613974e+01 |
| Cr | 9.724297e+00 | 2.788880e-01 | 1.622622e+01 |
| Cr | 4.716565e+00 | 5.259868e+00 | 1.623670e+01 |
| C  | 1.244786e+00 | 7.746195e+00 | 1.704989e+01 |
| C  | 8.188043e+00 | 2.773185e+00 | 1.705028e+01 |
| C  | 7.232680e+00 | 8.722068e+00 | 1.705028e+01 |
| C  | 2.200446e+00 | 1.797672e+00 | 1.705041e+01 |
| C  | 6.252326e+00 | 7.756019e+00 | 1.705062e+01 |
| C  | 3.180833e+00 | 2.763594e+00 | 1.705071e+01 |
| C  | 2.230947e+00 | 6.785697e+00 | 1.705818e+01 |
| C  | 7.201915e+00 | 3.733896e+00 | 1.705835e+01 |
| F  | 2.912030e-01 | 7.756001e+00 | 1.799128e+01 |
| F  | 9.141241e+00 | 2.762931e+00 | 1.799196e+01 |
| F  | 7.258507e+00 | 9.679251e+00 | 1.799286e+01 |
| F  | 2.174546e+00 | 8.404666e-01 | 1.799303e+01 |
| F  | 5.300852e+00 | 7.748928e+00 | 1.799399e+01 |
| F  | 4.132351e+00 | 2.770604e+00 | 1.799410e+01 |
| F  | 2.264545e+00 | 5.836802e+00 | 1.800893e+01 |
| F  | 7.167889e+00 | 4.682523e+00 | 1.800927e+01 |

1L-Cr(py<sub>z</sub>)<sub>2</sub> molecular junction

170

Device

|    |              |              |              |
|----|--------------|--------------|--------------|
| Au | 1.252185e+00 | 1.245013e+00 | 1.019562e+00 |
| Au | 3.756065e+00 | 1.245013e+00 | 1.019562e+00 |
| Au | 6.259945e+00 | 1.245013e+00 | 1.019562e+00 |
| Au | 8.763825e+00 | 1.245013e+00 | 1.019562e+00 |
| Au | 1.252675e+00 | 3.735041e+00 | 1.019562e+00 |
| Au | 3.756555e+00 | 3.735041e+00 | 1.019562e+00 |
| Au | 6.260435e+00 | 3.735041e+00 | 1.019562e+00 |
| Au | 8.764315e+00 | 3.735041e+00 | 1.019562e+00 |
| Au | 1.253165e+00 | 6.225069e+00 | 1.019562e+00 |
| Au | 3.757045e+00 | 6.225069e+00 | 1.019562e+00 |
| Au | 6.260925e+00 | 6.225069e+00 | 1.019562e+00 |
| Au | 8.764805e+00 | 6.225069e+00 | 1.019562e+00 |
| Au | 1.253655e+00 | 8.715098e+00 | 1.019562e+00 |
| Au | 3.757535e+00 | 8.715098e+00 | 1.019562e+00 |
| Au | 6.261415e+00 | 8.715098e+00 | 1.019562e+00 |
| Au | 8.765295e+00 | 8.715098e+00 | 1.019562e+00 |
| Au | 0.000000e+00 | 0.000000e+00 | 3.058688e+00 |

|    |              |              |              |
|----|--------------|--------------|--------------|
| Au | 2.503880e+00 | 1.900000e-11 | 3.058688e+00 |
| Au | 5.007760e+00 | 3.800000e-11 | 3.058688e+00 |
| Au | 7.511640e+00 | 5.800000e-11 | 3.058688e+00 |
| Au | 4.899026e-04 | 2.490027e+00 | 3.058688e+00 |
| Au | 2.504370e+00 | 2.490027e+00 | 3.058688e+00 |
| Au | 5.008250e+00 | 2.490027e+00 | 3.058688e+00 |
| Au | 7.512130e+00 | 2.490027e+00 | 3.058688e+00 |
| Au | 9.798054e-04 | 4.980055e+00 | 3.058688e+00 |
| Au | 2.504860e+00 | 4.980055e+00 | 3.058688e+00 |
| Au | 5.008740e+00 | 4.980055e+00 | 3.058688e+00 |
| Au | 7.512620e+00 | 4.980055e+00 | 3.058688e+00 |
| Au | 1.469708e-03 | 7.470083e+00 | 3.058688e+00 |
| Au | 2.505350e+00 | 7.470083e+00 | 3.058688e+00 |
| Au | 5.009230e+00 | 7.470083e+00 | 3.058688e+00 |
| Au | 7.513110e+00 | 7.470083e+00 | 3.058688e+00 |
| Au | 1.252185e+00 | 1.245013e+00 | 5.097813e+00 |
| Au | 3.756065e+00 | 1.245013e+00 | 5.097813e+00 |
| Au | 6.259945e+00 | 1.245013e+00 | 5.097813e+00 |
| Au | 8.763825e+00 | 1.245013e+00 | 5.097813e+00 |
| Au | 1.252675e+00 | 3.735041e+00 | 5.097813e+00 |
| Au | 3.756555e+00 | 3.735041e+00 | 5.097813e+00 |
| Au | 6.260435e+00 | 3.735041e+00 | 5.097813e+00 |
| Au | 8.764315e+00 | 3.735041e+00 | 5.097813e+00 |
| Au | 1.253165e+00 | 6.225069e+00 | 5.097813e+00 |
| Au | 3.757045e+00 | 6.225069e+00 | 5.097813e+00 |
| Au | 6.260925e+00 | 6.225069e+00 | 5.097813e+00 |
| Au | 8.764805e+00 | 6.225069e+00 | 5.097813e+00 |
| Au | 1.253655e+00 | 8.715098e+00 | 5.097813e+00 |
| Au | 3.757535e+00 | 8.715098e+00 | 5.097813e+00 |
| Au | 6.261415e+00 | 8.715098e+00 | 5.097813e+00 |
| Au | 8.765295e+00 | 8.715098e+00 | 5.097813e+00 |
| Au | 0.000000e+00 | 0.000000e+00 | 7.136938e+00 |
| Au | 2.503880e+00 | 1.900000e-11 | 7.136938e+00 |
| Au | 5.007760e+00 | 3.800000e-11 | 7.136938e+00 |
| Au | 7.511640e+00 | 5.800000e-11 | 7.136938e+00 |
| Au | 4.899026e-04 | 2.490027e+00 | 7.136938e+00 |
| Au | 2.504370e+00 | 2.490027e+00 | 7.136938e+00 |
| Au | 5.008250e+00 | 2.490027e+00 | 7.136938e+00 |
| Au | 7.512130e+00 | 2.490027e+00 | 7.136938e+00 |
| Au | 9.798054e-04 | 4.980055e+00 | 7.136938e+00 |
| Au | 2.504860e+00 | 4.980055e+00 | 7.136938e+00 |
| Au | 5.008740e+00 | 4.980055e+00 | 7.136938e+00 |
| Au | 7.512620e+00 | 4.980055e+00 | 7.136938e+00 |
| Au | 1.469708e-03 | 7.470083e+00 | 7.136938e+00 |

|    |              |              |              |
|----|--------------|--------------|--------------|
| Au | 2.505350e+00 | 7.470083e+00 | 7.136938e+00 |
| Au | 5.009230e+00 | 7.470083e+00 | 7.136938e+00 |
| Au | 7.513110e+00 | 7.470083e+00 | 7.136938e+00 |
| H  | 7.681710e+00 | 4.470140e+00 | 9.697417e+00 |
| H  | 9.440233e+00 | 2.720868e+00 | 9.702441e+00 |
| H  | 2.237859e+00 | 5.505429e+00 | 9.700064e+00 |
| H  | 4.796595e-01 | 7.254481e+00 | 9.705074e+00 |
| H  | 5.469626e+00 | 7.722166e+00 | 9.727707e+00 |
| H  | 2.699173e+00 | 5.036861e-01 | 9.731230e+00 |
| H  | 7.222580e+00 | 9.475105e+00 | 9.731630e+00 |
| H  | 4.454198e+00 | 2.254716e+00 | 9.734413e+00 |
| C  | 7.567545e+00 | 3.585111e+00 | 1.034520e+01 |
| C  | 8.553488e+00 | 2.604991e+00 | 1.034838e+01 |
| C  | 2.353419e+00 | 6.391289e+00 | 1.034623e+01 |
| C  | 1.367473e+00 | 7.371326e+00 | 1.034976e+01 |
| C  | 6.365115e+00 | 7.596580e+00 | 1.035961e+01 |
| C  | 7.348924e+00 | 8.578877e+00 | 1.036075e+01 |
| C  | 3.557542e+00 | 2.380525e+00 | 1.036436e+01 |
| C  | 2.572941e+00 | 1.398982e+00 | 1.036175e+01 |
| N  | 6.456956e+00 | 6.472634e+00 | 1.113345e+01 |
| N  | 1.446597e+00 | 1.494145e+00 | 1.113361e+01 |
| N  | 3.469250e+00 | 6.476777e+00 | 1.113419e+01 |
| Cr | 4.960641e+00 | 4.989616e+00 | 1.113625e+01 |
| N  | 6.452938e+00 | 3.500837e+00 | 1.113464e+01 |
| N  | 3.464862e+00 | 3.503780e+00 | 1.113971e+01 |
| N  | 8.473553e+00 | 8.483793e+00 | 1.113554e+01 |
| N  | 8.473081e+00 | 1.493934e+00 | 1.114179e+01 |
| Cr | 9.967219e+00 | 9.738589e-03 | 1.114045e+01 |
| N  | 1.448407e+00 | 8.483340e+00 | 1.114174e+01 |
| C  | 7.581729e+00 | 6.376949e+00 | 1.190737e+01 |
| C  | 1.353258e+00 | 2.617846e+00 | 1.190761e+01 |
| C  | 2.337724e+00 | 3.599031e+00 | 1.191099e+01 |
| C  | 8.565423e+00 | 7.359235e+00 | 1.190897e+01 |
| C  | 3.551307e+00 | 7.589745e+00 | 1.192486e+01 |
| C  | 2.564955e+00 | 8.569565e+00 | 1.192826e+01 |
| C  | 6.372377e+00 | 2.389539e+00 | 1.192778e+01 |
| C  | 7.357959e+00 | 1.409167e+00 | 1.193100e+01 |
| H  | 7.706846e+00 | 5.480352e+00 | 1.253618e+01 |
| H  | 4.556891e-01 | 2.743483e+00 | 1.253645e+01 |
| H  | 2.209811e+00 | 4.494604e+00 | 1.254080e+01 |
| H  | 9.460658e+00 | 7.232826e+00 | 1.254064e+01 |
| H  | 4.439666e+00 | 7.707842e+00 | 1.256819e+01 |
| H  | 2.680721e+00 | 9.456093e+00 | 1.257367e+01 |
| H  | 5.484978e+00 | 2.274247e+00 | 1.257357e+01 |

|    |               |              |              |
|----|---------------|--------------|--------------|
| H  | 7.243076e+00  | 5.237296e-01 | 1.257808e+01 |
| Au | -3.940000e-10 | 4.881287e-06 | 1.513694e+01 |
| Au | 2.503880e+00  | 4.881306e-06 | 1.513694e+01 |
| Au | 5.007760e+00  | 4.881325e-06 | 1.513694e+01 |
| Au | 7.511640e+00  | 4.881344e-06 | 1.513694e+01 |
| Au | 4.899022e-04  | 2.490032e+00 | 1.513694e+01 |
| Au | 2.504370e+00  | 2.490032e+00 | 1.513694e+01 |
| Au | 5.008250e+00  | 2.490032e+00 | 1.513694e+01 |
| Au | 7.512130e+00  | 2.490032e+00 | 1.513694e+01 |
| Au | 9.798050e-04  | 4.980060e+00 | 1.513694e+01 |
| Au | 2.504860e+00  | 4.980060e+00 | 1.513694e+01 |
| Au | 5.008740e+00  | 4.980060e+00 | 1.513694e+01 |
| Au | 7.512620e+00  | 4.980060e+00 | 1.513694e+01 |
| Au | 1.469708e-03  | 7.470088e+00 | 1.513694e+01 |
| Au | 2.505350e+00  | 7.470088e+00 | 1.513694e+01 |
| Au | 5.009230e+00  | 7.470088e+00 | 1.513694e+01 |
| Au | 7.513110e+00  | 7.470088e+00 | 1.513694e+01 |
| Au | 1.252185e+00  | 1.245018e+00 | 1.717606e+01 |
| Au | 3.756065e+00  | 1.245018e+00 | 1.717606e+01 |
| Au | 6.259945e+00  | 1.245018e+00 | 1.717606e+01 |
| Au | 8.763825e+00  | 1.245018e+00 | 1.717606e+01 |
| Au | 1.252675e+00  | 3.735046e+00 | 1.717606e+01 |
| Au | 3.756555e+00  | 3.735046e+00 | 1.717606e+01 |
| Au | 6.260435e+00  | 3.735046e+00 | 1.717606e+01 |
| Au | 8.764315e+00  | 3.735046e+00 | 1.717606e+01 |
| Au | 1.253165e+00  | 6.225074e+00 | 1.717606e+01 |
| Au | 3.757045e+00  | 6.225074e+00 | 1.717606e+01 |
| Au | 6.260925e+00  | 6.225074e+00 | 1.717606e+01 |
| Au | 8.764805e+00  | 6.225074e+00 | 1.717606e+01 |
| Au | 1.253655e+00  | 8.715102e+00 | 1.717606e+01 |
| Au | 3.757535e+00  | 8.715102e+00 | 1.717606e+01 |
| Au | 6.261415e+00  | 8.715102e+00 | 1.717606e+01 |
| Au | 8.765295e+00  | 8.715102e+00 | 1.717606e+01 |
| Au | -3.940000e-10 | 4.881287e-06 | 1.921519e+01 |
| Au | 2.503880e+00  | 4.881306e-06 | 1.921519e+01 |
| Au | 5.007760e+00  | 4.881325e-06 | 1.921519e+01 |
| Au | 7.511640e+00  | 4.881344e-06 | 1.921519e+01 |
| Au | 4.899022e-04  | 2.490032e+00 | 1.921519e+01 |
| Au | 2.504370e+00  | 2.490032e+00 | 1.921519e+01 |
| Au | 5.008250e+00  | 2.490032e+00 | 1.921519e+01 |
| Au | 7.512130e+00  | 2.490032e+00 | 1.921519e+01 |
| Au | 9.798050e-04  | 4.980060e+00 | 1.921519e+01 |
| Au | 2.504860e+00  | 4.980060e+00 | 1.921519e+01 |
| Au | 5.008740e+00  | 4.980060e+00 | 1.921519e+01 |

|    |              |              |              |
|----|--------------|--------------|--------------|
| Au | 7.512620e+00 | 4.980060e+00 | 1.921519e+01 |
| Au | 1.469708e-03 | 7.470088e+00 | 1.921519e+01 |
| Au | 2.505350e+00 | 7.470088e+00 | 1.921519e+01 |
| Au | 5.009230e+00 | 7.470088e+00 | 1.921519e+01 |
| Au | 7.513110e+00 | 7.470088e+00 | 1.921519e+01 |
| Au | 1.252185e+00 | 1.245018e+00 | 2.125431e+01 |
| Au | 3.756065e+00 | 1.245018e+00 | 2.125431e+01 |
| Au | 6.259945e+00 | 1.245018e+00 | 2.125431e+01 |
| Au | 8.763825e+00 | 1.245018e+00 | 2.125431e+01 |
| Au | 1.252675e+00 | 3.735046e+00 | 2.125431e+01 |
| Au | 3.756555e+00 | 3.735046e+00 | 2.125431e+01 |
| Au | 6.260435e+00 | 3.735046e+00 | 2.125431e+01 |
| Au | 8.764315e+00 | 3.735046e+00 | 2.125431e+01 |
| Au | 1.253165e+00 | 6.225074e+00 | 2.125431e+01 |
| Au | 3.757045e+00 | 6.225074e+00 | 2.125431e+01 |
| Au | 6.260925e+00 | 6.225074e+00 | 2.125431e+01 |
| Au | 8.764805e+00 | 6.225074e+00 | 2.125431e+01 |
| Au | 1.253655e+00 | 8.715102e+00 | 2.125431e+01 |
| Au | 3.757535e+00 | 8.715102e+00 | 2.125431e+01 |
| Au | 6.261415e+00 | 8.715102e+00 | 2.125431e+01 |
| Au | 8.765295e+00 | 8.715102e+00 | 2.125431e+01 |

2L-Cr(py<sub>z</sub>)<sub>2</sub> molecular junction

212

Device

|    |              |              |              |
|----|--------------|--------------|--------------|
| Au | 1.277305e+00 | 1.487515e+00 | 1.019562e+00 |
| Au | 3.781185e+00 | 1.487515e+00 | 1.019562e+00 |
| Au | 6.285065e+00 | 1.487515e+00 | 1.019562e+00 |
| Au | 8.788946e+00 | 1.487515e+00 | 1.019562e+00 |
| Au | 1.277795e+00 | 3.977543e+00 | 1.019562e+00 |
| Au | 3.781675e+00 | 3.977543e+00 | 1.019562e+00 |
| Au | 6.285555e+00 | 3.977543e+00 | 1.019562e+00 |
| Au | 8.789435e+00 | 3.977543e+00 | 1.019562e+00 |
| Au | 1.278285e+00 | 6.467572e+00 | 1.019562e+00 |
| Au | 3.782165e+00 | 6.467572e+00 | 1.019562e+00 |
| Au | 6.286045e+00 | 6.467572e+00 | 1.019562e+00 |
| Au | 8.789925e+00 | 6.467572e+00 | 1.019562e+00 |
| Au | 1.278775e+00 | 8.957600e+00 | 1.019562e+00 |
| Au | 3.782655e+00 | 8.957600e+00 | 1.019562e+00 |
| Au | 6.286535e+00 | 8.957600e+00 | 1.019562e+00 |
| Au | 8.790415e+00 | 8.957600e+00 | 1.019562e+00 |
| Au | 2.512040e-02 | 2.425023e-01 | 3.058688e+00 |
| Au | 2.529000e+00 | 2.425023e-01 | 3.058688e+00 |
| Au | 5.032880e+00 | 2.425023e-01 | 3.058688e+00 |
| Au | 7.536761e+00 | 2.425023e-01 | 3.058688e+00 |

|    |              |              |              |
|----|--------------|--------------|--------------|
| Au | 2.561031e-02 | 2.732529e+00 | 3.058688e+00 |
| Au | 2.529490e+00 | 2.732529e+00 | 3.058688e+00 |
| Au | 5.033370e+00 | 2.732529e+00 | 3.058688e+00 |
| Au | 7.537250e+00 | 2.732529e+00 | 3.058688e+00 |
| Au | 2.610021e-02 | 5.222557e+00 | 3.058688e+00 |
| Au | 2.529980e+00 | 5.222557e+00 | 3.058688e+00 |
| Au | 5.033860e+00 | 5.222557e+00 | 3.058688e+00 |
| Au | 7.537740e+00 | 5.222557e+00 | 3.058688e+00 |
| Au | 2.659011e-02 | 7.712586e+00 | 3.058688e+00 |
| Au | 2.530470e+00 | 7.712586e+00 | 3.058688e+00 |
| Au | 5.034350e+00 | 7.712586e+00 | 3.058688e+00 |
| Au | 7.538230e+00 | 7.712586e+00 | 3.058688e+00 |
| Au | 1.277305e+00 | 1.487515e+00 | 5.097813e+00 |
| Au | 3.781185e+00 | 1.487515e+00 | 5.097813e+00 |
| Au | 6.285065e+00 | 1.487515e+00 | 5.097813e+00 |
| Au | 8.788946e+00 | 1.487515e+00 | 5.097813e+00 |
| Au | 1.277795e+00 | 3.977543e+00 | 5.097813e+00 |
| Au | 3.781675e+00 | 3.977543e+00 | 5.097813e+00 |
| Au | 6.285555e+00 | 3.977543e+00 | 5.097813e+00 |
| Au | 8.789435e+00 | 3.977543e+00 | 5.097813e+00 |
| Au | 1.278285e+00 | 6.467572e+00 | 5.097813e+00 |
| Au | 3.782165e+00 | 6.467572e+00 | 5.097813e+00 |
| Au | 6.286045e+00 | 6.467572e+00 | 5.097813e+00 |
| Au | 8.789925e+00 | 6.467572e+00 | 5.097813e+00 |
| Au | 1.278775e+00 | 8.957600e+00 | 5.097813e+00 |
| Au | 3.782655e+00 | 8.957600e+00 | 5.097813e+00 |
| Au | 6.286535e+00 | 8.957600e+00 | 5.097813e+00 |
| Au | 8.790415e+00 | 8.957600e+00 | 5.097813e+00 |
| Au | 2.512040e-02 | 2.425023e-01 | 7.136938e+00 |
| Au | 2.529000e+00 | 2.425023e-01 | 7.136938e+00 |
| Au | 5.032880e+00 | 2.425023e-01 | 7.136938e+00 |
| Au | 7.536761e+00 | 2.425023e-01 | 7.136938e+00 |
| Au | 2.561031e-02 | 2.732529e+00 | 7.136938e+00 |
| Au | 2.529490e+00 | 2.732529e+00 | 7.136938e+00 |
| Au | 5.033370e+00 | 2.732529e+00 | 7.136938e+00 |
| Au | 7.537250e+00 | 2.732529e+00 | 7.136938e+00 |
| Au | 2.610021e-02 | 5.222557e+00 | 7.136938e+00 |
| Au | 2.529980e+00 | 5.222557e+00 | 7.136938e+00 |
| Au | 5.033860e+00 | 5.222557e+00 | 7.136938e+00 |
| Au | 7.537740e+00 | 5.222557e+00 | 7.136938e+00 |
| Au | 2.659011e-02 | 7.712586e+00 | 7.136938e+00 |
| Au | 2.530470e+00 | 7.712586e+00 | 7.136938e+00 |
| Au | 5.034350e+00 | 7.712586e+00 | 7.136938e+00 |
| Au | 7.538230e+00 | 7.712586e+00 | 7.136938e+00 |

|    |              |              |              |
|----|--------------|--------------|--------------|
| H  | 7.728816e+00 | 4.736896e+00 | 9.693828e+00 |
| H  | 2.237403e+00 | 5.722401e+00 | 9.696146e+00 |
| H  | 9.487102e+00 | 2.997258e+00 | 9.700406e+00 |
| H  | 4.817090e-01 | 7.464422e+00 | 9.701261e+00 |
| H  | 5.474693e+00 | 7.992039e+00 | 9.719731e+00 |
| H  | 2.737486e+00 | 7.270866e-01 | 9.716365e+00 |
| H  | 7.229072e+00 | 9.734829e+00 | 9.717650e+00 |
| H  | 4.493789e+00 | 2.467761e+00 | 9.719982e+00 |
| C  | 7.605808e+00 | 3.841371e+00 | 1.032510e+01 |
| C  | 2.363262e+00 | 6.618808e+00 | 1.032518e+01 |
| C  | 8.591047e+00 | 2.866905e+00 | 1.032895e+01 |
| C  | 1.378945e+00 | 7.594141e+00 | 1.032872e+01 |
| C  | 6.378512e+00 | 7.854456e+00 | 1.033543e+01 |
| C  | 7.362018e+00 | 8.830858e+00 | 1.033395e+01 |
| C  | 2.606412e+00 | 1.629800e+00 | 1.033490e+01 |
| C  | 3.591298e+00 | 2.604793e+00 | 1.033752e+01 |
| N  | 6.460897e+00 | 6.712614e+00 | 1.110012e+01 |
| N  | 1.463681e+00 | 1.720428e+00 | 1.109748e+01 |
| N  | 3.499159e+00 | 6.701446e+00 | 1.109921e+01 |
| N  | 6.470982e+00 | 3.758335e+00 | 1.109989e+01 |
| N  | 8.504660e+00 | 8.740639e+00 | 1.109748e+01 |
| Cr | 4.984716e+00 | 5.227949e+00 | 1.099706e+01 |
| N  | 3.509890e+00 | 3.745963e+00 | 1.110320e+01 |
| Cr | 9.991573e+00 | 2.485700e-01 | 1.099979e+01 |
| N  | 1.453551e+00 | 8.726914e+00 | 1.110697e+01 |
| N  | 8.517485e+00 | 1.734111e+00 | 1.110783e+01 |
| C  | 7.606561e+00 | 6.622352e+00 | 1.186781e+01 |
| C  | 1.381458e+00 | 2.865220e+00 | 1.186681e+01 |
| C  | 8.587315e+00 | 7.596118e+00 | 1.186681e+01 |
| C  | 2.363553e+00 | 3.837606e+00 | 1.186956e+01 |
| C  | 3.574291e+00 | 7.837521e+00 | 1.188205e+01 |
| C  | 6.397883e+00 | 2.624104e+00 | 1.188541e+01 |
| C  | 2.592066e+00 | 8.810026e+00 | 1.188610e+01 |
| C  | 7.380479e+00 | 1.652062e+00 | 1.188902e+01 |
| H  | 7.724912e+00 | 5.712929e+00 | 1.247531e+01 |
| H  | 4.719839e-01 | 2.989006e+00 | 1.247340e+01 |
| H  | 9.495939e+00 | 7.473737e+00 | 1.247511e+01 |
| H  | 2.245764e+00 | 4.747113e+00 | 1.247710e+01 |
| H  | 4.477137e+00 | 7.953494e+00 | 1.250027e+01 |
| H  | 5.496521e+00 | 2.509831e+00 | 1.250602e+01 |
| H  | 2.702166e+00 | 9.711719e+00 | 1.250676e+01 |
| H  | 7.271782e+00 | 7.513507e-01 | 1.251127e+01 |
| H  | 7.704834e+00 | 4.726949e+00 | 1.446365e+01 |
| H  | 2.266534e+00 | 5.732382e+00 | 1.446547e+01 |



|    |              |              |              |
|----|--------------|--------------|--------------|
| H  | 9.478824e+00 | 2.967362e+00 | 1.446934e+01 |
| H  | 4.903578e-01 | 7.489800e+00 | 1.447167e+01 |
| H  | 5.485208e+00 | 7.966295e+00 | 1.449458e+01 |
| H  | 2.715397e+00 | 7.355990e-01 | 1.449544e+01 |
| H  | 7.257410e+00 | 9.725992e+00 | 1.449565e+01 |
| H  | 4.487788e+00 | 2.494740e+00 | 1.450041e+01 |
| C  | 7.595773e+00 | 3.826491e+00 | 1.508630e+01 |
| C  | 2.375521e+00 | 6.633608e+00 | 1.508691e+01 |
| C  | 8.577388e+00 | 2.853418e+00 | 1.509000e+01 |
| C  | 1.392419e+00 | 7.605106e+00 | 1.509105e+01 |
| C  | 6.393355e+00 | 7.843105e+00 | 1.510328e+01 |
| C  | 7.374711e+00 | 8.816233e+00 | 1.510287e+01 |
| C  | 2.596648e+00 | 1.644485e+00 | 1.510366e+01 |
| C  | 3.578125e+00 | 2.617536e+00 | 1.510702e+01 |
| N  | 6.474759e+00 | 6.698435e+00 | 1.587288e+01 |
| N  | 1.450124e+00 | 1.734683e+00 | 1.587012e+01 |
| N  | 3.513383e+00 | 6.716641e+00 | 1.586666e+01 |
| N  | 6.458888e+00 | 3.745284e+00 | 1.586792e+01 |
| N  | 8.519614e+00 | 8.725165e+00 | 1.587142e+01 |
| Cr | 4.985022e+00 | 5.228714e+00 | 1.597456e+01 |
| N  | 3.495313e+00 | 3.761548e+00 | 1.587715e+01 |
| Cr | 9.991643e+00 | 2.478979e-01 | 1.597754e+01 |
| N  | 1.465795e+00 | 8.739933e+00 | 1.587567e+01 |
| N  | 8.503352e+00 | 1.718885e+00 | 1.587507e+01 |
| C  | 7.616418e+00 | 6.608072e+00 | 1.663713e+01 |
| C  | 1.367260e+00 | 2.876377e+00 | 1.663509e+01 |
| C  | 8.600697e+00 | 7.583643e+00 | 1.663656e+01 |
| C  | 2.351386e+00 | 3.852100e+00 | 1.663879e+01 |
| C  | 3.587995e+00 | 7.850729e+00 | 1.664366e+01 |
| C  | 6.384423e+00 | 2.613197e+00 | 1.664712e+01 |
| C  | 2.602123e+00 | 8.824650e+00 | 1.664814e+01 |
| C  | 7.368223e+00 | 1.637273e+00 | 1.665041e+01 |
| H  | 7.746809e+00 | 5.705045e+00 | 1.725532e+01 |
| H  | 4.624462e-01 | 3.014120e+00 | 1.724915e+01 |
| H  | 9.502307e+00 | 7.446903e+00 | 1.725548e+01 |
| H  | 2.217923e+00 | 4.755762e+00 | 1.725539e+01 |
| H  | 4.485348e+00 | 7.982759e+00 | 1.726998e+01 |
| H  | 5.487928e+00 | 2.484789e+00 | 1.727605e+01 |
| H  | 2.725918e+00 | 9.721162e+00 | 1.727785e+01 |
| H  | 7.242579e+00 | 7.415116e-01 | 1.728056e+01 |
| Au | 2.512040e-02 | 2.425072e-01 | 1.983694e+01 |
| Au | 2.529000e+00 | 2.425072e-01 | 1.983694e+01 |
| Au | 5.032880e+00 | 2.425072e-01 | 1.983694e+01 |
| Au | 7.536761e+00 | 2.425072e-01 | 1.983694e+01 |

|    |              |              |              |
|----|--------------|--------------|--------------|
| Au | 2.561031e-02 | 2.732534e+00 | 1.983694e+01 |
| Au | 2.529490e+00 | 2.732534e+00 | 1.983694e+01 |
| Au | 5.033370e+00 | 2.732534e+00 | 1.983694e+01 |
| Au | 7.537250e+00 | 2.732534e+00 | 1.983694e+01 |
| Au | 2.610021e-02 | 5.222562e+00 | 1.983694e+01 |
| Au | 2.529980e+00 | 5.222562e+00 | 1.983694e+01 |
| Au | 5.033860e+00 | 5.222562e+00 | 1.983694e+01 |
| Au | 7.537740e+00 | 5.222562e+00 | 1.983694e+01 |
| Au | 2.659011e-02 | 7.712591e+00 | 1.983694e+01 |
| Au | 2.530470e+00 | 7.712591e+00 | 1.983694e+01 |
| Au | 5.034350e+00 | 7.712591e+00 | 1.983694e+01 |
| Au | 7.538230e+00 | 7.712591e+00 | 1.983694e+01 |
| Au | 1.277305e+00 | 1.487520e+00 | 2.187606e+01 |
| Au | 3.781185e+00 | 1.487520e+00 | 2.187606e+01 |
| Au | 6.285065e+00 | 1.487520e+00 | 2.187606e+01 |
| Au | 8.788946e+00 | 1.487520e+00 | 2.187606e+01 |
| Au | 1.277795e+00 | 3.977548e+00 | 2.187606e+01 |
| Au | 3.781675e+00 | 3.977548e+00 | 2.187606e+01 |
| Au | 6.285555e+00 | 3.977548e+00 | 2.187606e+01 |
| Au | 8.789435e+00 | 3.977548e+00 | 2.187606e+01 |
| Au | 1.278285e+00 | 6.467576e+00 | 2.187606e+01 |
| Au | 3.782165e+00 | 6.467576e+00 | 2.187606e+01 |
| Au | 6.286045e+00 | 6.467576e+00 | 2.187606e+01 |
| Au | 8.789925e+00 | 6.467576e+00 | 2.187606e+01 |
| Au | 1.278775e+00 | 8.957605e+00 | 2.187606e+01 |
| Au | 3.782655e+00 | 8.957605e+00 | 2.187606e+01 |
| Au | 6.286535e+00 | 8.957605e+00 | 2.187606e+01 |
| Au | 8.790415e+00 | 8.957605e+00 | 2.187606e+01 |
| Au | 2.512040e-02 | 2.425072e-01 | 2.391519e+01 |
| Au | 2.529000e+00 | 2.425072e-01 | 2.391519e+01 |
| Au | 5.032880e+00 | 2.425072e-01 | 2.391519e+01 |
| Au | 7.536761e+00 | 2.425072e-01 | 2.391519e+01 |
| Au | 2.561031e-02 | 2.732534e+00 | 2.391519e+01 |
| Au | 2.529490e+00 | 2.732534e+00 | 2.391519e+01 |
| Au | 5.033370e+00 | 2.732534e+00 | 2.391519e+01 |
| Au | 7.537250e+00 | 2.732534e+00 | 2.391519e+01 |
| Au | 2.610021e-02 | 5.222562e+00 | 2.391519e+01 |
| Au | 2.529980e+00 | 5.222562e+00 | 2.391519e+01 |
| Au | 5.033860e+00 | 5.222562e+00 | 2.391519e+01 |
| Au | 7.537740e+00 | 5.222562e+00 | 2.391519e+01 |
| Au | 2.659011e-02 | 7.712591e+00 | 2.391519e+01 |
| Au | 2.530470e+00 | 7.712591e+00 | 2.391519e+01 |
| Au | 5.034350e+00 | 7.712591e+00 | 2.391519e+01 |
| Au | 7.538230e+00 | 7.712591e+00 | 2.391519e+01 |

|    |              |              |              |
|----|--------------|--------------|--------------|
| Au | 1.277305e+00 | 1.487520e+00 | 2.595431e+01 |
| Au | 3.781185e+00 | 1.487520e+00 | 2.595431e+01 |
| Au | 6.285065e+00 | 1.487520e+00 | 2.595431e+01 |
| Au | 8.788946e+00 | 1.487520e+00 | 2.595431e+01 |
| Au | 1.277795e+00 | 3.977548e+00 | 2.595431e+01 |
| Au | 3.781675e+00 | 3.977548e+00 | 2.595431e+01 |
| Au | 6.285555e+00 | 3.977548e+00 | 2.595431e+01 |
| Au | 8.789435e+00 | 3.977548e+00 | 2.595431e+01 |
| Au | 1.278285e+00 | 6.467576e+00 | 2.595431e+01 |
| Au | 3.782165e+00 | 6.467576e+00 | 2.595431e+01 |
| Au | 6.286045e+00 | 6.467576e+00 | 2.595431e+01 |
| Au | 8.789925e+00 | 6.467576e+00 | 2.595431e+01 |
| Au | 1.278775e+00 | 8.957605e+00 | 2.595431e+01 |
| Au | 3.782655e+00 | 8.957605e+00 | 2.595431e+01 |
| Au | 6.286535e+00 | 8.957605e+00 | 2.595431e+01 |
| Au | 8.790415e+00 | 8.957605e+00 | 2.595431e+01 |

1L-Cr(h-pyz)<sub>2</sub> molecular junction

170

Device

|    |              |              |              |
|----|--------------|--------------|--------------|
| Au | 8.590125e+00 | 1.488083e+00 | 1.019562e+00 |
| Au | 6.086245e+00 | 1.488576e+00 | 1.019562e+00 |
| Au | 3.582365e+00 | 1.489068e+00 | 1.019562e+00 |
| Au | 1.078485e+00 | 1.489561e+00 | 1.019562e+00 |
| Au | 8.590125e+00 | 3.978112e+00 | 1.019562e+00 |
| Au | 6.086245e+00 | 3.978604e+00 | 1.019562e+00 |
| Au | 3.582365e+00 | 3.979097e+00 | 1.019562e+00 |
| Au | 1.078485e+00 | 3.979589e+00 | 1.019562e+00 |
| Au | 8.590125e+00 | 6.468140e+00 | 1.019562e+00 |
| Au | 6.086245e+00 | 6.468632e+00 | 1.019562e+00 |
| Au | 3.582365e+00 | 6.469125e+00 | 1.019562e+00 |
| Au | 1.078485e+00 | 6.469618e+00 | 1.019562e+00 |
| Au | 8.590125e+00 | 8.958168e+00 | 1.019562e+00 |
| Au | 6.086245e+00 | 8.958661e+00 | 1.019562e+00 |
| Au | 3.582365e+00 | 8.959153e+00 | 1.019562e+00 |
| Au | 1.078485e+00 | 8.959646e+00 | 1.019562e+00 |
| Au | 9.842065e+00 | 2.428242e-01 | 3.058688e+00 |
| Au | 7.338185e+00 | 2.433168e-01 | 3.058688e+00 |
| Au | 4.834305e+00 | 2.438094e-01 | 3.058688e+00 |
| Au | 2.330425e+00 | 2.443021e-01 | 3.058688e+00 |
| Au | 9.842065e+00 | 2.732851e+00 | 3.058688e+00 |
| Au | 7.338185e+00 | 2.733344e+00 | 3.058688e+00 |
| Au | 4.834305e+00 | 2.733836e+00 | 3.058688e+00 |
| Au | 2.330425e+00 | 2.734329e+00 | 3.058688e+00 |
| Au | 9.842065e+00 | 5.222879e+00 | 3.058688e+00 |

|    |              |              |              |
|----|--------------|--------------|--------------|
| Au | 7.338185e+00 | 5.223372e+00 | 3.058688e+00 |
| Au | 4.834305e+00 | 5.223865e+00 | 3.058688e+00 |
| Au | 2.330425e+00 | 5.224357e+00 | 3.058688e+00 |
| Au | 9.842065e+00 | 7.712908e+00 | 3.058688e+00 |
| Au | 7.338185e+00 | 7.713400e+00 | 3.058688e+00 |
| Au | 4.834305e+00 | 7.713893e+00 | 3.058688e+00 |
| Au | 2.330425e+00 | 7.714386e+00 | 3.058688e+00 |
| Au | 8.590125e+00 | 1.488083e+00 | 5.097813e+00 |
| Au | 6.086245e+00 | 1.488576e+00 | 5.097813e+00 |
| Au | 3.582365e+00 | 1.489068e+00 | 5.097813e+00 |
| Au | 1.078485e+00 | 1.489561e+00 | 5.097813e+00 |
| Au | 8.590125e+00 | 3.978112e+00 | 5.097813e+00 |
| Au | 6.086245e+00 | 3.978604e+00 | 5.097813e+00 |
| Au | 3.582365e+00 | 3.979097e+00 | 5.097813e+00 |
| Au | 1.078485e+00 | 3.979589e+00 | 5.097813e+00 |
| Au | 8.590125e+00 | 6.468140e+00 | 5.097813e+00 |
| Au | 6.086245e+00 | 6.468632e+00 | 5.097813e+00 |
| Au | 3.582365e+00 | 6.469125e+00 | 5.097813e+00 |
| Au | 1.078485e+00 | 6.469618e+00 | 5.097813e+00 |
| Au | 8.590125e+00 | 8.958168e+00 | 5.097813e+00 |
| Au | 6.086245e+00 | 8.958661e+00 | 5.097813e+00 |
| Au | 3.582365e+00 | 8.959153e+00 | 5.097813e+00 |
| Au | 1.078485e+00 | 8.959646e+00 | 5.097813e+00 |
| Au | 9.842065e+00 | 2.428242e-01 | 7.136938e+00 |
| Au | 7.338185e+00 | 2.433168e-01 | 7.136938e+00 |
| Au | 4.834305e+00 | 2.438094e-01 | 7.136938e+00 |
| Au | 2.330425e+00 | 2.443021e-01 | 7.136938e+00 |
| Au | 9.842065e+00 | 2.732851e+00 | 7.136938e+00 |
| Au | 7.338185e+00 | 2.733344e+00 | 7.136938e+00 |
| Au | 4.834305e+00 | 2.733836e+00 | 7.136938e+00 |
| Au | 2.330425e+00 | 2.734329e+00 | 7.136938e+00 |
| Au | 9.842065e+00 | 5.222879e+00 | 7.136938e+00 |
| Au | 7.338185e+00 | 5.223372e+00 | 7.136938e+00 |
| Au | 4.834305e+00 | 5.223865e+00 | 7.136938e+00 |
| Au | 2.330425e+00 | 5.224357e+00 | 7.136938e+00 |
| Au | 9.842065e+00 | 7.712908e+00 | 7.136938e+00 |
| Au | 7.338185e+00 | 7.713400e+00 | 7.136938e+00 |
| Au | 4.834305e+00 | 7.713893e+00 | 7.136938e+00 |
| Au | 2.330425e+00 | 7.714386e+00 | 7.136938e+00 |
| H  | 7.444845e+00 | 6.435283e-01 | 9.423095e+00 |
| H  | 2.571124e+00 | 9.315943e+00 | 9.423628e+00 |
| H  | 7.579865e+00 | 5.618231e+00 | 9.430198e+00 |
| H  | 2.435890e+00 | 4.340831e+00 | 9.430208e+00 |
| H  | 6.611405e-01 | 2.596066e+00 | 9.432343e+00 |

|    |              |               |              |
|----|--------------|---------------|--------------|
| H  | 9.354573e+00 | 7.363094e+00  | 9.432358e+00 |
| H  | 5.661227e+00 | 2.379792e+00  | 9.440139e+00 |
| H  | 4.354624e+00 | 7.579623e+00  | 9.440771e+00 |
| C  | 7.482085e+00 | 1.478759e+00  | 1.013890e+01 |
| C  | 2.533610e+00 | 8.480606e+00  | 1.013924e+01 |
| C  | 7.541328e+00 | 6.456278e+00  | 1.014251e+01 |
| C  | 2.474365e+00 | 3.502819e+00  | 1.014253e+01 |
| C  | 8.520401e+00 | 7.419294e+00  | 1.014333e+01 |
| C  | 1.495174e+00 | 2.539837e+00  | 1.014341e+01 |
| C  | 6.498543e+00 | 2.437413e+00  | 1.014715e+01 |
| C  | 3.517168e+00 | 7.521853e+00  | 1.014751e+01 |
| N  | 8.549561e+00 | 1.484883e+00  | 1.102334e+01 |
| N  | 1.466105e+00 | 8.474526e+00  | 1.102363e+01 |
| N  | 6.477158e+00 | 6.460870e+00  | 1.103097e+01 |
| N  | 3.538461e+00 | 3.498178e+00  | 1.103106e+01 |
| N  | 8.535560e+00 | 8.488509e+00  | 1.103186e+01 |
| N  | 1.479886e+00 | 1.470725e+00  | 1.103203e+01 |
| N  | 6.482187e+00 | 3.503351e+00  | 1.103934e+01 |
| N  | 3.533512e+00 | 6.455976e+00  | 1.103974e+01 |
| Cr | 1.001548e+01 | -1.399735e-03 | 1.112622e+01 |
| Cr | 5.007750e+00 | 4.979580e+00  | 1.113670e+01 |
| C  | 1.535971e+00 | 7.465908e+00  | 1.194989e+01 |
| C  | 8.479228e+00 | 2.492897e+00  | 1.195028e+01 |
| C  | 7.523865e+00 | 8.441780e+00  | 1.195028e+01 |
| C  | 2.491631e+00 | 1.517385e+00  | 1.195041e+01 |
| C  | 6.543511e+00 | 7.475731e+00  | 1.195062e+01 |
| C  | 3.472018e+00 | 2.483307e+00  | 1.195071e+01 |
| C  | 2.522132e+00 | 6.505409e+00  | 1.195818e+01 |
| C  | 7.493100e+00 | 3.453608e+00  | 1.195835e+01 |
| F  | 5.823881e-01 | 7.475713e+00  | 1.289128e+01 |
| F  | 9.432426e+00 | 2.482643e+00  | 1.289196e+01 |
| F  | 7.549693e+00 | 9.398964e+00  | 1.289286e+01 |
| F  | 2.465731e+00 | 5.601788e-01  | 1.289303e+01 |
| F  | 5.592038e+00 | 7.468640e+00  | 1.289399e+01 |
| F  | 4.423536e+00 | 2.490316e+00  | 1.289410e+01 |
| F  | 2.555730e+00 | 5.556514e+00  | 1.290893e+01 |
| F  | 7.459074e+00 | 4.402236e+00  | 1.290927e+01 |
| Au | 9.842065e+00 | 2.428242e-01  | 1.519927e+01 |
| Au | 7.338185e+00 | 2.433168e-01  | 1.519927e+01 |
| Au | 4.834305e+00 | 2.438094e-01  | 1.519927e+01 |
| Au | 2.330425e+00 | 2.443021e-01  | 1.519927e+01 |
| Au | 9.842065e+00 | 2.732851e+00  | 1.519927e+01 |
| Au | 7.338185e+00 | 2.733344e+00  | 1.519927e+01 |
| Au | 4.834305e+00 | 2.733836e+00  | 1.519927e+01 |

|    |              |              |              |
|----|--------------|--------------|--------------|
| Au | 2.330425e+00 | 2.734329e+00 | 1.519927e+01 |
| Au | 9.842065e+00 | 5.222879e+00 | 1.519927e+01 |
| Au | 7.338185e+00 | 5.223372e+00 | 1.519927e+01 |
| Au | 4.834305e+00 | 5.223865e+00 | 1.519927e+01 |
| Au | 2.330425e+00 | 5.224357e+00 | 1.519927e+01 |
| Au | 9.842065e+00 | 7.712908e+00 | 1.519927e+01 |
| Au | 7.338185e+00 | 7.713400e+00 | 1.519927e+01 |
| Au | 4.834305e+00 | 7.713893e+00 | 1.519927e+01 |
| Au | 2.330425e+00 | 7.714386e+00 | 1.519927e+01 |
| Au | 8.590125e+00 | 1.488083e+00 | 1.723840e+01 |
| Au | 6.086245e+00 | 1.488576e+00 | 1.723840e+01 |
| Au | 3.582365e+00 | 1.489068e+00 | 1.723840e+01 |
| Au | 1.078485e+00 | 1.489561e+00 | 1.723840e+01 |
| Au | 8.590125e+00 | 3.978112e+00 | 1.723840e+01 |
| Au | 6.086245e+00 | 3.978604e+00 | 1.723840e+01 |
| Au | 3.582365e+00 | 3.979097e+00 | 1.723840e+01 |
| Au | 1.078485e+00 | 3.979589e+00 | 1.723840e+01 |
| Au | 8.590125e+00 | 6.468140e+00 | 1.723840e+01 |
| Au | 6.086245e+00 | 6.468632e+00 | 1.723840e+01 |
| Au | 3.582365e+00 | 6.469125e+00 | 1.723840e+01 |
| Au | 1.078485e+00 | 6.469618e+00 | 1.723840e+01 |
| Au | 8.590125e+00 | 8.958168e+00 | 1.723840e+01 |
| Au | 6.086245e+00 | 8.958661e+00 | 1.723840e+01 |
| Au | 3.582365e+00 | 8.959153e+00 | 1.723840e+01 |
| Au | 1.078485e+00 | 8.959646e+00 | 1.723840e+01 |
| Au | 9.842065e+00 | 2.428242e-01 | 1.927752e+01 |
| Au | 7.338185e+00 | 2.433168e-01 | 1.927752e+01 |
| Au | 4.834305e+00 | 2.438094e-01 | 1.927752e+01 |
| Au | 2.330425e+00 | 2.443021e-01 | 1.927752e+01 |
| Au | 9.842065e+00 | 2.732851e+00 | 1.927752e+01 |
| Au | 7.338185e+00 | 2.733344e+00 | 1.927752e+01 |
| Au | 4.834305e+00 | 2.733836e+00 | 1.927752e+01 |
| Au | 2.330425e+00 | 2.734329e+00 | 1.927752e+01 |
| Au | 9.842065e+00 | 5.222879e+00 | 1.927752e+01 |
| Au | 7.338185e+00 | 5.223372e+00 | 1.927752e+01 |
| Au | 4.834305e+00 | 5.223865e+00 | 1.927752e+01 |
| Au | 2.330425e+00 | 5.224357e+00 | 1.927752e+01 |
| Au | 9.842065e+00 | 7.712908e+00 | 1.927752e+01 |
| Au | 7.338185e+00 | 7.713400e+00 | 1.927752e+01 |
| Au | 4.834305e+00 | 7.713893e+00 | 1.927752e+01 |
| Au | 2.330425e+00 | 7.714386e+00 | 1.927752e+01 |
| Au | 8.590125e+00 | 1.488083e+00 | 2.131665e+01 |
| Au | 6.086245e+00 | 1.488576e+00 | 2.131665e+01 |
| Au | 3.582365e+00 | 1.489068e+00 | 2.131665e+01 |

|    |              |              |              |
|----|--------------|--------------|--------------|
| Au | 1.078485e+00 | 1.489561e+00 | 2.131665e+01 |
| Au | 8.590125e+00 | 3.978112e+00 | 2.131665e+01 |
| Au | 6.086245e+00 | 3.978604e+00 | 2.131665e+01 |
| Au | 3.582365e+00 | 3.979097e+00 | 2.131665e+01 |
| Au | 1.078485e+00 | 3.979589e+00 | 2.131665e+01 |
| Au | 8.590125e+00 | 6.468140e+00 | 2.131665e+01 |
| Au | 6.086245e+00 | 6.468632e+00 | 2.131665e+01 |
| Au | 3.582365e+00 | 6.469125e+00 | 2.131665e+01 |
| Au | 1.078485e+00 | 6.469618e+00 | 2.131665e+01 |
| Au | 8.590125e+00 | 8.958168e+00 | 2.131665e+01 |
| Au | 6.086245e+00 | 8.958661e+00 | 2.131665e+01 |
| Au | 3.582365e+00 | 8.959153e+00 | 2.131665e+01 |
| Au | 1.078485e+00 | 8.959646e+00 | 2.131665e+01 |

2L-Cr(h-pyz)<sub>2</sub> molecular junction

212

Device

|    |              |              |              |
|----|--------------|--------------|--------------|
| Au | 7.872994e-01 | 1.769849e+00 | 1.019562e+00 |
| Au | 3.291179e+00 | 1.769356e+00 | 1.019562e+00 |
| Au | 5.795059e+00 | 1.768864e+00 | 1.019562e+00 |
| Au | 8.298939e+00 | 1.768371e+00 | 1.019562e+00 |
| Au | 7.872994e-01 | 4.259877e+00 | 1.019562e+00 |
| Au | 3.291179e+00 | 4.259385e+00 | 1.019562e+00 |
| Au | 5.795059e+00 | 4.258892e+00 | 1.019562e+00 |
| Au | 8.298939e+00 | 4.258399e+00 | 1.019562e+00 |
| Au | 7.872994e-01 | 6.749906e+00 | 1.019562e+00 |
| Au | 3.291179e+00 | 6.749413e+00 | 1.019562e+00 |
| Au | 5.795059e+00 | 6.748920e+00 | 1.019562e+00 |
| Au | 8.298939e+00 | 6.748428e+00 | 1.019562e+00 |
| Au | 7.872994e-01 | 9.239934e+00 | 1.019562e+00 |
| Au | 3.291179e+00 | 9.239441e+00 | 1.019562e+00 |
| Au | 5.795059e+00 | 9.238949e+00 | 1.019562e+00 |
| Au | 8.298939e+00 | 9.238456e+00 | 1.019562e+00 |
| Au | 2.039239e+00 | 5.245899e-01 | 3.058688e+00 |
| Au | 4.543119e+00 | 5.240973e-01 | 3.058688e+00 |

|    |              |              |              |
|----|--------------|--------------|--------------|
| Au | 7.046999e+00 | 5.236046e-01 | 3.058688e+00 |
| Au | 9.550879e+00 | 5.231120e-01 | 3.058688e+00 |
| Au | 2.039239e+00 | 3.014617e+00 | 3.058688e+00 |
| Au | 4.543119e+00 | 3.014124e+00 | 3.058688e+00 |
| Au | 7.046999e+00 | 3.013632e+00 | 3.058688e+00 |
| Au | 9.550879e+00 | 3.013139e+00 | 3.058688e+00 |
| Au | 2.039239e+00 | 5.504645e+00 | 3.058688e+00 |
| Au | 4.543119e+00 | 5.504152e+00 | 3.058688e+00 |
| Au | 7.046999e+00 | 5.503660e+00 | 3.058688e+00 |
| Au | 9.550879e+00 | 5.503167e+00 | 3.058688e+00 |
| Au | 2.039239e+00 | 7.994673e+00 | 3.058688e+00 |
| Au | 4.543119e+00 | 7.994181e+00 | 3.058688e+00 |
| Au | 7.046999e+00 | 7.993688e+00 | 3.058688e+00 |
| Au | 9.550879e+00 | 7.993196e+00 | 3.058688e+00 |
| Au | 7.872994e-01 | 1.769849e+00 | 5.097813e+00 |
| Au | 3.291179e+00 | 1.769356e+00 | 5.097813e+00 |
| Au | 5.795059e+00 | 1.768864e+00 | 5.097813e+00 |
| Au | 8.298939e+00 | 1.768371e+00 | 5.097813e+00 |
| Au | 7.872994e-01 | 4.259877e+00 | 5.097813e+00 |
| Au | 3.291179e+00 | 4.259385e+00 | 5.097813e+00 |
| Au | 5.795059e+00 | 4.258892e+00 | 5.097813e+00 |
| Au | 8.298939e+00 | 4.258399e+00 | 5.097813e+00 |
| Au | 7.872994e-01 | 6.749906e+00 | 5.097813e+00 |
| Au | 3.291179e+00 | 6.749413e+00 | 5.097813e+00 |
| Au | 5.795059e+00 | 6.748920e+00 | 5.097813e+00 |
| Au | 8.298939e+00 | 6.748428e+00 | 5.097813e+00 |
| Au | 7.872994e-01 | 9.239934e+00 | 5.097813e+00 |
| Au | 3.291179e+00 | 9.239441e+00 | 5.097813e+00 |
| Au | 5.795059e+00 | 9.238949e+00 | 5.097813e+00 |
| Au | 8.298939e+00 | 9.238456e+00 | 5.097813e+00 |



|    |              |              |              |
|----|--------------|--------------|--------------|
| Au | 2.039239e+00 | 5.245899e-01 | 7.136938e+00 |
| Au | 4.543119e+00 | 5.240973e-01 | 7.136938e+00 |
| Au | 7.046999e+00 | 5.236046e-01 | 7.136938e+00 |
| Au | 9.550879e+00 | 5.231120e-01 | 7.136938e+00 |
| Au | 2.039239e+00 | 3.014617e+00 | 7.136938e+00 |
| Au | 4.543119e+00 | 3.014124e+00 | 7.136938e+00 |
| Au | 7.046999e+00 | 3.013632e+00 | 7.136938e+00 |
| Au | 9.550879e+00 | 3.013139e+00 | 7.136938e+00 |
| Au | 2.039239e+00 | 5.504645e+00 | 7.136938e+00 |
| Au | 4.543119e+00 | 5.504152e+00 | 7.136938e+00 |
| Au | 7.046999e+00 | 5.503660e+00 | 7.136938e+00 |
| Au | 9.550879e+00 | 5.503167e+00 | 7.136938e+00 |
| Au | 2.039239e+00 | 7.994673e+00 | 7.136938e+00 |
| Au | 4.543119e+00 | 7.994181e+00 | 7.136938e+00 |
| Au | 7.046999e+00 | 7.993688e+00 | 7.136938e+00 |
| Au | 9.550879e+00 | 7.993196e+00 | 7.136938e+00 |
| H  | 7.153660e+00 | 9.238162e-01 | 9.423095e+00 |
| H  | 2.279939e+00 | 9.596230e+00 | 9.423628e+00 |
| H  | 7.288680e+00 | 5.898519e+00 | 9.430198e+00 |
| H  | 2.144705e+00 | 4.621119e+00 | 9.430208e+00 |
| H  | 3.699553e-01 | 2.876354e+00 | 9.432343e+00 |
| H  | 9.063388e+00 | 7.643381e+00 | 9.432358e+00 |
| H  | 5.370042e+00 | 2.660080e+00 | 9.440139e+00 |
| H  | 4.063439e+00 | 7.859911e+00 | 9.440771e+00 |
| C  | 7.190900e+00 | 1.759047e+00 | 1.013890e+01 |
| C  | 2.242425e+00 | 8.760894e+00 | 1.013924e+01 |
| C  | 7.250143e+00 | 6.736566e+00 | 1.014251e+01 |
| C  | 2.183180e+00 | 3.783107e+00 | 1.014253e+01 |
| C  | 8.229216e+00 | 7.699582e+00 | 1.014333e+01 |
| C  | 1.203989e+00 | 2.820125e+00 | 1.014341e+01 |

|    |              |              |              |
|----|--------------|--------------|--------------|
| C  | 6.207358e+00 | 2.717701e+00 | 1.014715e+01 |
| C  | 3.225983e+00 | 7.802141e+00 | 1.014751e+01 |
| N  | 8.258376e+00 | 1.765171e+00 | 1.102334e+01 |
| N  | 1.174920e+00 | 8.754814e+00 | 1.102363e+01 |
| N  | 6.185973e+00 | 6.741158e+00 | 1.103097e+01 |
| N  | 3.247276e+00 | 3.778466e+00 | 1.103106e+01 |
| N  | 8.244375e+00 | 8.768797e+00 | 1.103186e+01 |
| N  | 1.188701e+00 | 1.751013e+00 | 1.103203e+01 |
| N  | 6.191001e+00 | 3.783639e+00 | 1.103934e+01 |
| N  | 3.242326e+00 | 6.736264e+00 | 1.103974e+01 |
| Cr | 9.724297e+00 | 2.788881e-01 | 1.112622e+01 |
| Cr | 4.716565e+00 | 5.259868e+00 | 1.113670e+01 |
| C  | 1.244786e+00 | 7.746195e+00 | 1.194989e+01 |
| C  | 8.188043e+00 | 2.773185e+00 | 1.195028e+01 |
| C  | 7.232680e+00 | 8.722068e+00 | 1.195028e+01 |
| C  | 2.200446e+00 | 1.797673e+00 | 1.195041e+01 |
| C  | 6.252326e+00 | 7.756019e+00 | 1.195062e+01 |
| C  | 3.180832e+00 | 2.763595e+00 | 1.195071e+01 |
| C  | 2.230947e+00 | 6.785697e+00 | 1.195818e+01 |
| C  | 7.201914e+00 | 3.733896e+00 | 1.195835e+01 |
| F  | 2.912029e-01 | 7.756001e+00 | 1.289128e+01 |
| F  | 9.141241e+00 | 2.762931e+00 | 1.289196e+01 |
| F  | 7.258507e+00 | 9.679252e+00 | 1.289286e+01 |
| F  | 2.174546e+00 | 8.404667e-01 | 1.289303e+01 |
| F  | 5.300852e+00 | 7.748928e+00 | 1.289399e+01 |
| F  | 4.132351e+00 | 2.770604e+00 | 1.289410e+01 |
| F  | 2.264545e+00 | 5.836802e+00 | 1.290893e+01 |
| F  | 7.167889e+00 | 4.682524e+00 | 1.290927e+01 |
| H  | 7.153660e+00 | 9.238162e-01 | 1.452310e+01 |
| H  | 2.279939e+00 | 9.596230e+00 | 1.452363e+01 |

|    |              |              |              |
|----|--------------|--------------|--------------|
| H  | 7.288680e+00 | 5.898519e+00 | 1.453020e+01 |
| H  | 2.144705e+00 | 4.621119e+00 | 1.453021e+01 |
| H  | 3.699553e-01 | 2.876354e+00 | 1.453234e+01 |
| H  | 9.063388e+00 | 7.643381e+00 | 1.453236e+01 |
| H  | 5.370042e+00 | 2.660080e+00 | 1.454014e+01 |
| H  | 4.063439e+00 | 7.859911e+00 | 1.454077e+01 |
| C  | 7.190900e+00 | 1.759047e+00 | 1.523890e+01 |
| C  | 2.242425e+00 | 8.760894e+00 | 1.523924e+01 |
| C  | 7.250143e+00 | 6.736566e+00 | 1.524251e+01 |
| C  | 2.183180e+00 | 3.783107e+00 | 1.524253e+01 |
| C  | 8.229216e+00 | 7.699582e+00 | 1.524333e+01 |
| C  | 1.203989e+00 | 2.820125e+00 | 1.524341e+01 |
| C  | 6.207358e+00 | 2.717701e+00 | 1.524715e+01 |
| C  | 3.225983e+00 | 7.802141e+00 | 1.524751e+01 |
| N  | 8.258376e+00 | 1.765171e+00 | 1.612334e+01 |
| N  | 1.174920e+00 | 8.754814e+00 | 1.612363e+01 |
| N  | 6.185973e+00 | 6.741158e+00 | 1.613097e+01 |
| N  | 3.247276e+00 | 3.778466e+00 | 1.613106e+01 |
| N  | 8.244375e+00 | 8.768797e+00 | 1.613186e+01 |
| N  | 1.188701e+00 | 1.751013e+00 | 1.613203e+01 |
| N  | 6.191001e+00 | 3.783639e+00 | 1.613934e+01 |
| N  | 3.242326e+00 | 6.736264e+00 | 1.613974e+01 |
| Cr | 9.724297e+00 | 2.788881e-01 | 1.622622e+01 |
| Cr | 4.716565e+00 | 5.259868e+00 | 1.623670e+01 |
| C  | 1.244786e+00 | 7.746195e+00 | 1.704989e+01 |
| C  | 8.188043e+00 | 2.773185e+00 | 1.705028e+01 |
| C  | 7.232680e+00 | 8.722068e+00 | 1.705028e+01 |
| C  | 2.200446e+00 | 1.797673e+00 | 1.705041e+01 |
| C  | 6.252326e+00 | 7.756019e+00 | 1.705062e+01 |
| C  | 3.180832e+00 | 2.763595e+00 | 1.705071e+01 |

|    |              |              |              |
|----|--------------|--------------|--------------|
| C  | 2.230947e+00 | 6.785697e+00 | 1.705818e+01 |
| C  | 7.201914e+00 | 3.733896e+00 | 1.705835e+01 |
| F  | 2.912029e-01 | 7.756001e+00 | 1.799128e+01 |
| F  | 9.141241e+00 | 2.762931e+00 | 1.799196e+01 |
| F  | 7.258507e+00 | 9.679252e+00 | 1.799286e+01 |
| F  | 2.174546e+00 | 8.404667e-01 | 1.799303e+01 |
| F  | 5.300852e+00 | 7.748928e+00 | 1.799399e+01 |
| F  | 4.132351e+00 | 2.770604e+00 | 1.799410e+01 |
| F  | 2.264545e+00 | 5.836802e+00 | 1.800893e+01 |
| F  | 7.167889e+00 | 4.682524e+00 | 1.800927e+01 |
| Au | 2.039240e+00 | 5.245948e-01 | 2.080890e+01 |
| Au | 4.543120e+00 | 5.241022e-01 | 2.080890e+01 |
| Au | 7.047000e+00 | 5.236095e-01 | 2.080890e+01 |
| Au | 9.550880e+00 | 5.231169e-01 | 2.080890e+01 |
| Au | 2.039240e+00 | 3.014622e+00 | 2.080890e+01 |
| Au | 4.543120e+00 | 3.014129e+00 | 2.080890e+01 |
| Au | 7.047000e+00 | 3.013636e+00 | 2.080890e+01 |
| Au | 9.550880e+00 | 3.013144e+00 | 2.080890e+01 |
| Au | 2.039240e+00 | 5.504650e+00 | 2.080890e+01 |
| Au | 4.543120e+00 | 5.504157e+00 | 2.080890e+01 |
| Au | 7.047000e+00 | 5.503665e+00 | 2.080890e+01 |
| Au | 9.550880e+00 | 5.503172e+00 | 2.080890e+01 |
| Au | 2.039240e+00 | 7.994678e+00 | 2.080890e+01 |
| Au | 4.543120e+00 | 7.994186e+00 | 2.080890e+01 |
| Au | 7.047000e+00 | 7.993693e+00 | 2.080890e+01 |
| Au | 9.550880e+00 | 7.993200e+00 | 2.080890e+01 |
| Au | 7.873000e-01 | 1.769854e+00 | 2.284803e+01 |
| Au | 3.291180e+00 | 1.769361e+00 | 2.284803e+01 |
| Au | 5.795060e+00 | 1.768869e+00 | 2.284803e+01 |
| Au | 8.298940e+00 | 1.768376e+00 | 2.284803e+01 |

|    |              |              |              |
|----|--------------|--------------|--------------|
| Au | 7.873000e-01 | 4.259882e+00 | 2.284803e+01 |
| Au | 3.291180e+00 | 4.259390e+00 | 2.284803e+01 |
| Au | 5.795060e+00 | 4.258897e+00 | 2.284803e+01 |
| Au | 8.298940e+00 | 4.258404e+00 | 2.284803e+01 |
| Au | 7.873000e-01 | 6.749910e+00 | 2.284803e+01 |
| Au | 3.291180e+00 | 6.749418e+00 | 2.284803e+01 |
| Au | 5.795060e+00 | 6.748925e+00 | 2.284803e+01 |
| Au | 8.298940e+00 | 6.748433e+00 | 2.284803e+01 |
| Au | 7.873000e-01 | 9.239939e+00 | 2.284803e+01 |
| Au | 3.291180e+00 | 9.239446e+00 | 2.284803e+01 |
| Au | 5.795060e+00 | 9.238954e+00 | 2.284803e+01 |
| Au | 8.298940e+00 | 9.238461e+00 | 2.284803e+01 |
| Au | 2.039240e+00 | 5.245948e-01 | 2.488715e+01 |
| Au | 4.543120e+00 | 5.241022e-01 | 2.488715e+01 |
| Au | 7.047000e+00 | 5.236095e-01 | 2.488715e+01 |
| Au | 9.550880e+00 | 5.231169e-01 | 2.488715e+01 |
| Au | 2.039240e+00 | 3.014622e+00 | 2.488715e+01 |
| Au | 4.543120e+00 | 3.014129e+00 | 2.488715e+01 |
| Au | 7.047000e+00 | 3.013636e+00 | 2.488715e+01 |
| Au | 9.550880e+00 | 3.013144e+00 | 2.488715e+01 |
| Au | 2.039240e+00 | 5.504650e+00 | 2.488715e+01 |
| Au | 4.543120e+00 | 5.504157e+00 | 2.488715e+01 |
| Au | 7.047000e+00 | 5.503665e+00 | 2.488715e+01 |
| Au | 9.550880e+00 | 5.503172e+00 | 2.488715e+01 |
| Au | 2.039240e+00 | 7.994678e+00 | 2.488715e+01 |
| Au | 4.543120e+00 | 7.994186e+00 | 2.488715e+01 |
| Au | 7.047000e+00 | 7.993693e+00 | 2.488715e+01 |
| Au | 9.550880e+00 | 7.993200e+00 | 2.488715e+01 |
| Au | 7.873000e-01 | 1.769854e+00 | 2.692628e+01 |
| Au | 3.291180e+00 | 1.769361e+00 | 2.692628e+01 |

|    |              |              |              |
|----|--------------|--------------|--------------|
| Au | 5.795060e+00 | 1.768869e+00 | 2.692628e+01 |
| Au | 8.298940e+00 | 1.768376e+00 | 2.692628e+01 |
| Au | 7.873000e-01 | 4.259882e+00 | 2.692628e+01 |
| Au | 3.291180e+00 | 4.259390e+00 | 2.692628e+01 |
| Au | 5.795060e+00 | 4.258897e+00 | 2.692628e+01 |
| Au | 8.298940e+00 | 4.258404e+00 | 2.692628e+01 |
| Au | 7.873000e-01 | 6.749910e+00 | 2.692628e+01 |
| Au | 3.291180e+00 | 6.749418e+00 | 2.692628e+01 |
| Au | 5.795060e+00 | 6.748925e+00 | 2.692628e+01 |
| Au | 8.298940e+00 | 6.748433e+00 | 2.692628e+01 |
| Au | 7.873000e-01 | 9.239939e+00 | 2.692628e+01 |
| Au | 3.291180e+00 | 9.239446e+00 | 2.692628e+01 |
| Au | 5.795060e+00 | 9.238954e+00 | 2.692628e+01 |
| Au | 8.298940e+00 | 9.238461e+00 | 2.692628e+01 |
